**Fungal derived 15-keto-prostaglandin E<sub>2</sub> and host peroxisome proliferator-activated receptor gamma (PPAR-γ) promote *C. neoformans* growth during infection.**

**Authors:**

**Robert J. Evans<sup>1,2</sup>, Sarah Needs<sup>3</sup>, Ewa Bielska<sup>3</sup>, Robin C. May<sup>3,4</sup>, Stephen A. Renshaw<sup>1,2</sup>, Simon A. Johnston<sup>1,2</sup>**

<sup>1</sup> Bateson Centre, Firth Court, University of Sheffield, S10 2TN, UK.

<sup>2</sup> Department of Infection, Immunity and Cardiovascular Disease, Medical School, University of Sheffield, S10 2RX, UK.

<sup>3</sup> Institute of Microbiology and Infection, School of Biosciences, University of Birmingham, Birmingham, B15 2TT, UK.

<sup>4</sup> NIHR Surgical Reconstruction and Microbiology Research Centre, University Hospitals of Birmingham NHS Foundation Trust, Queen Elizabeth Hospital, Birmingham, UK

Running Title: Fungal derived 15-keto-prostaglandin E<sub>2</sub> and PPAR-γ promotes *C. neoformans* infection

\*Author for correspondence: Simon A. Johnston

Email: s.a.johnston@sheffield.ac.uk

Phone: +44 114 222 2301

## Abstract

*Cryptococcus neoformans* is one of the leading causes of invasive fungal infection in humans worldwide. *C. neoformans* can use macrophages as a proliferative niche to increase infective burden and avoid immune surveillance. However, the specific mechanisms by which *C. neoformans* manipulates host immunity to promote its growth during infection remain ill-defined. Here we demonstrate a key role for eicosanoid lipid mediators produced by *C. neoformans* in regulating host responses. *C. neoformans* is known to secrete several eicosanoids that are highly similar to those found in vertebrate hosts. Using the eicosanoid deficient cryptococcal mutant  $\Delta plb1$ , we demonstrate that prostaglandin  $E_2$  is required by *C. neoformans* for proliferation within macrophages and, using our zebrafish model of cryptococcosis, we confirm this role for  $PGE_2$  *in vivo*. Furthermore, we show that  $PGE_2$  must be dehydrogenated into 15-keto  $PGE_2$  to promote fungal growth. We find that activation of the intracellular 15-keto  $PGE_2$  receptor PPAR- $\gamma$  promotes fungal burden in zebrafish suggesting that cryptococcal 15-keto- $PGE_2$  is a novel virulence factor that may act as an agonist for PPAR- $\gamma$ .

## Author Summary:

*Cryptococcus neoformans* is an opportunistic fungal pathogen that is responsible for significant numbers of deaths in the immunocompromised population worldwide. Here we address whether eicosanoids produced by *C. neoformans* manipulate host innate immune cells during infection. *Cryptococcus neoformans* produces a number of eicosanoids that are notable for their similarity to vertebrate eicosanoids, it is therefore possible that fungal-derived eicosanoids may mimic physiological effects in the host. Using a combination of *in vitro* and *in vivo* infection models we identify a specific eicosanoid species - prostaglandin  $E_2$  – that is required by *C. neoformans* for growth during infection. We subsequently find that prostaglandin  $E_2$  must be converted to 15-keto prostaglandin  $E_2$  within the host before it has these effects. Furthermore, we provide evidence that the mechanism of prostaglandin  $E_2$ /15-keto prostaglandin  $E_2$  mediated virulence is via activation of host PPAR- $\gamma$  – an intracellular eicosanoid receptor known to interact with 15-keto  $PGE_2$ .

# Introduction

*Cryptococcus neoformans* is an opportunistic pathogen and that infects individuals who have severe immunodeficiencies such as late-stage HIV infection. *C. neoformans* is estimated to infect up to 1 million individuals each year globally and causes hundreds of thousands of deaths (1,2). *C. neoformans* infection begins as a respiratory infection but in the absence of an effective immune response the fungus disseminates to the central nervous system causing meningitis, and eventually death (3,4). *C. neoformans* initially grows within the alveolar spaces of the lungs as budding yeast before it is phagocytosed by macrophages. In normal immunity, macrophages must become activated by further inflammatory signals from the host immune system before they can effectively kill *C. neoformans* (5,6). When this does not occur macrophages cannot kill *C. neoformans*; instead the fungus is able to proliferate rapidly intracellularly and may use macrophages to disseminate to the central nervous system where it causes fatal meningitis (7-9).

An important group of inflammatory mediators produced during the initial stages of microbial infection by macrophages are eicosanoids. Eicosanoids are a diverse group of potent lipid signalling molecules that have a short range of action and communicate through autocrine or paracrine routes. During infection macrophages produce large amounts of a particular group of eicosanoids called prostaglandins (10,11). Prostaglandins have a number of physiological effects throughout the body, but in the context of immunity they are known to strongly influence the inflammatory state(12). Two particular prostaglandins - PGE<sub>2</sub> and PGD<sub>2</sub> – are the best-studied eicosanoid inflammatory mediators. During infection macrophages produce both PGE<sub>2</sub> and PGD<sub>2</sub> and, via autocrine routes, macrophages are highly responsive to PGE<sub>2</sub> and PGD<sub>2</sub> (12). In vertebrate immunity, the synthesis of eicosanoids such as PGE<sub>2</sub> is carefully regulated by feedback loops to ensure that the potent effects of these molecules are properly constrained. Exogenous sources of eicosanoids within the body, such as from eicosanoid-producing parasites (13) or tumours that overproduce eicosanoids (14,15), disrupt host inflammatory signaling as they are not subject to the same regulation.

During infection, *C. neoformans* produces a range of eicosanoid species which are indistinguishable from those produced by their vertebrate hosts (16-18). Currently only two *C. neoformans* enzymes - phospholipase B1 and laccase - are known to be associated with cryptococcal eicosanoid synthesis (18,19).

Deletion of phospholipase B1 reduces secreted levels of all eicosanoids produced by *C. neoformans* suggesting that it has high level role in eicosanoid synthesis (19), perhaps fulfilling the role of phospholipase A<sub>2</sub> in higher organisms. In contrast, it is possible that the cryptococcal enzyme has putative PGE<sub>2</sub> synthase activity (18). The synthesis of eicosanoids by *C. neoformans* raises the possibility that the fungus is able to manipulate host inflammation by directly manipulating host eicosanoid signaling during establishment of infection *in vivo*. During respiratory infection of mice, the inhibition of prostaglandin E<sub>2</sub> receptors EP2 and EP4 leads to better host survival accompanied by a shift towards Th1/M1 macrophage activation (20). Therefore, a key aspect of *C. neoformans* pathogenesis remains unanswered; do eicosanoids produced by *C. neoformans* manipulate host innate immune cells function during infection?

We hypothesised that eicosanoids produced by *C. neoformans* were able to promote intracellular proliferation within macrophages and virulence in the host. We have previously shown that the phospholipase B1 deficient strain  $\Delta plb1$ , that lacks eicosanoid synthesis, cannot replicate or survive within macrophages (21). Thus, we sought to determine whether this deficiency is directly due to lower levels of eicosanoids produced by *C. neoformans*. To address this question we have combined *in vitro* macrophage infection assays with our previous published *in vivo* zebrafish model of cryptococcosis (22). Using this approach, we show that prostaglandin E<sub>2</sub> is sufficient to promote growth of the  $\Delta plb1$  during *in vitro* infection of macrophages. We find that this eicosanoid is also able to promote growth of *C. neoformans* *in vivo* but activity requires the dehydrogenation of PGE<sub>2</sub> into 15-keto PGE<sub>2</sub>, and the activity of the 15-keto PGE<sub>2</sub> receptor PPAR- $\gamma$ .

# Results

## *C. neoformans* prostaglandin $E_2$ is required for growth in macrophages

We have shown previously that the *C. neoformans* *PLB1* gene (coding for the secreted enzyme phospholipase B1) deletion mutant  $\Delta plb1$  (23) has impaired proliferation and survival during infection of J774 murine macrophages *in vitro* (21). It has been proposed that the attenuation of  $\Delta plb1$  could be because this strain cannot produce eicosanoids such as  $PGE_2$  which could be used by *C. neoformans* to interfere with macrophage activation (19).

To establish if *C. neoformans* requires  $PGE_2$  synthesis for growth within macrophages we investigated whether the intracellular proliferation defect of  $\Delta plb1$  could be rescued with the addition of exogenous  $PGE_2$  to infected cells. We found that the addition of exogenous  $PGE_2$  to  $\Delta plb1$  infected J774 macrophages was sufficient to partially recover the intracellular proliferation rate (IPR) of  $\Delta plb1$  compared to its parental strain H99 (Fig 1A). These findings support our hypothesis that eicosanoid synthesis by *C. neoformans* is required to promote proliferation of the fungus during macrophage infection, furthermore they identify  $PGE_2$  as a mediator of cryptococcal virulence during macrophage infection.

## *Phospholipase B1 dependent secreted factors are produced by C. neoformans to promote macrophage infection*

After finding that  $PGE_2$  is required by *C. neoformans* to proliferate within macrophages, we next wanted to determine whether *C. neoformans* is the source of this growth promoting factor during macrophage infection. To test if *C. neoformans* produces phospholipase B1 dependent secretory factors, such as  $PGE_2$ , to promote intracellular growth we used a co-infection assay which has previously been used to investigate the interaction of different *C. gattii* strains within the same macrophage (24). If the parental strain H99 produces growth promoting factors that  $\Delta plb1$  cannot, we reasoned that  $\Delta plb1$  cells would display improved intracellular replication when H99 was also present within the same macrophage.

To produce co-infection, we infected macrophages with a 50:50 mixture of  $\Delta plb1$  and H99-GFP (25) (Fig 2B i; as described previously for *C. gattii* (24)). The intracellular proliferation of  $\Delta plb1$  was calculated by counting the change in number of non-fluorescent  $\Delta plb1$  cells over an 18hr period from time-lapse movies of infected cells. Although we infected our macrophages with a 50:50 mixture of  $\Delta plb1$  and H99-GFP we found that co-infected macrophages did not always contain the same ratio of each strain. To control for differences in burden between macrophages, we only scored macrophages that had an initial burden of two  $\Delta plb1$  yeast cells to one H99-GFP yeast cell or vice versa. Interestingly we found that  $\Delta plb1$  (Fig 1B) proliferated better when accompanied by two H99-GFP yeast cells in the same macrophage (Fig 1 B ii, 1:2) as opposed to when two  $\Delta plb1$  yeast cells were accompanied by one H99-GFP yeast cell (Fig 1 B ii, 2:1). This suggests that there is a secreted factor produced by H99, but absent in  $\Delta plb1$  that can promote intracellular proliferation within macrophages.

*PGE<sub>2</sub> synthesis by C. neoformans is required for growth in vivo.*

After showing that PGE<sub>2</sub> produced by *C. neoformans* promotes *in vitro* fungal growth within macrophages we wanted to see if these interactions could be reproduced *in vivo*. Zebrafish have been proven to be an excellent model for understanding vertebrate eicosanoid biology (26,27) so we chose to investigate these interactions using our zebrafish model of cryptococcosis (22). One of the advantages of this infection model is that because we use fluorescently tagged *C. neoformans* strains, the fungal burden within infected larvae can be non-invasively imaged throughout infection. To use  $\Delta plb1$  with our zebrafish larvae infection model we generated a constitutively expressed GFP tagged version of the  $\Delta plb1$  ( $\Delta plb1$ -GFP). We next evaluated the growth of  $\Delta plb1$ -GFP by infecting zebrafish larval with  $\Delta plb1$ —GFP and measuring the growth of the fungus at 1,2 and 3 days post infection (dpi). Analysis of fungal burden revealed that  $\Delta plb1$ -GFP had a lower fungal burden at 1, 2 and 3 days post infection compared to the parental strain H99-GFP (Fig 2A, C). These data show that the  $\Delta plb1$  mutant has a similar growth deficiency in our *in vivo* model to our *in vitro* data and previous studies (21,23,28).

After confirming that fungal burden is reduced *in vivo*, we next wanted to investigate if this phenotype was due to an inability to generate PGE<sub>2</sub>. We treated  $\Delta plb1$  and H99 infections with PGE<sub>2</sub> and PGD<sub>2</sub> (PGD<sub>2</sub> tends to produce context-dependent opposing immune signalling to PGE<sub>2</sub> (15)). PGE<sub>2</sub>, but not PGD<sub>2</sub>, increased fungal burden of both the parental H99 strain (Fig 2B,  $p = 0.0137$ , 1.35-fold increase vs. DMSO) and the  $\Delta plb1$ -GFP mutant (Fig 2F,  $p = 0.0001$ , 2.15-fold increase vs. DMSO). Taken together these data show that PGE<sub>2</sub> is required for growth *in vivo*; this is in agreement with our *in vitro* findings suggesting that growth *in vivo* may rely on eicosanoid production during macrophage infection.

*Prostaglandin E<sub>2</sub> must be dehydrogenated into 15-keto-PGE<sub>2</sub> in order to facilitate C. neoformans growth.*

PGE<sub>2</sub> produced by *C. neoformans* can be further converted into 15-keto-PGE<sub>2</sub> (18). Due to the possibility that some of the PGE<sub>2</sub> added to zebrafish might be converted to 15-keto-PGE<sub>2</sub> we wanted to determine if the effects we observed were due to the activity of PGE<sub>2</sub> or 15-keto-PGE<sub>2</sub>. To test this, we treated infected larvae with 16,16-dimethyl PGE<sub>2</sub>, which cannot be dehydrogenated into 15-keto-PGE<sub>2</sub>, but otherwise has comparable activity to PGE<sub>2</sub> (29). Interestingly, in contrast to PGE<sub>2</sub>, we found that 16,16-dimethyl PGE<sub>2</sub> treatment did not increase the fungal burden of  $\Delta plb1$ -GFP (Fig 4E and 4G,  $p = 0.9782$ ) or H99-GFP infected larvae (Fig 4A and 4C,  $p = 0.9954$ ). To confirm that *C. neoformans* growth rate is facilitated by 15-keto-PGE<sub>2</sub> we treated infected larvae with exogenous 15-keto-PGE<sub>2</sub> and found that this was sufficient to significantly increase the fungal burden of both  $\Delta plb1$ -GFP (Fig 4F and 4H,  $p = 0.0119$ , 1.56-fold increase vs. DMSO) and H99-GFP infections (Fig 4B and 4C,  $p = 0.0048$ , 1.36-fold increase vs. DMSO). Taken together, these results demonstrated that the increase in *C. neoformans* burden we observed with PGE<sub>2</sub> treatment for both  $\Delta plb1$ -GFP and H99-GFP were due to dehydrogenation of PGE<sub>2</sub> into 15-keto-PGE<sub>2</sub>.

*15-keto-PGE<sub>2</sub> promotes C. neoformans growth by activating host PPAR- $\gamma$*

We next wanted to determine if 15-keto-PGE<sub>2</sub> is able to promote cryptococcal growth by interfering with host eicosanoid signalling pathways. 16,16-dimethyl PGE<sub>2</sub> signals through the same host receptors as

PGE<sub>2</sub> so its lack of activity in this system strongly suggests different molecular pathways for 15-keto PGE<sub>2</sub> and PGE<sub>2</sub>. With 15-keto PGE<sub>2</sub> has been reported as an agonist at the peroxisome proliferation associated receptor gamma (PPAR- $\gamma$ ) (30); a transcription factor that controls expression of many inflammation related. To determine if 15-keto PGE<sub>2</sub> promotes the growth of *C. neoformans* during host infection by activating host PPAR- $\gamma$  we treated infected larvae with a specific agonist of PPAR- $\gamma$  - Troglitazone (TLT) - at a concentration (0.55  $\mu$ M) shown to strongly activate PPAR- $\gamma$  in zebrafish larvae (31). We found that TLT treatment produced a significantly increased the fungal burden of  $\Delta plb1$ -GFP (Fig 5B and 5D,  $p = 0.0089$ , 1.68-fold increase vs. DMSO) and H99-GFP (Fig 5A and 5C,  $p = 0.0044$ , 1.46-fold increase vs. DMSO) infected larvae similar to 15-keto PGE<sub>2</sub> treatment. These findings suggest that 15-keto PGE<sub>2</sub> promotes fungal growth by activating PPAR- $\gamma$ .

In conclusion, we have shown for the first time that eicosanoids produced by *C. neoformans* are required for virulence both *in vitro* and *in vivo*. We have shown that the intracellular growth defect of  $\Delta plb1$  (21,23) can be rescued with the addition of exogenous PGE<sub>2</sub> (Fig 1A). Furthermore, with our co-infection experiments we provide evidence that the source of this eicosanoid during infection is from the pathogen, rather than the host (Fig 1 B). Using a zebrafish larvae *in vivo* model of cryptococcosis we have gone on to show that a recently described fungal burden defect during larval infection can also be rescued with the addition of PGE<sub>2</sub> (Fig 2). Additionally we find that that PGE<sub>2</sub> appears to require dehydrogenated into 15-keto PGE<sub>2</sub> before it has a biological effect (Fig 2 and 3). Finally, we provide evidence that the mechanism of PGE<sub>2</sub>/15-keto PGE<sub>2</sub> mediated growth promotion during larval infection may be via the activation of PPAR- $\gamma$  – an intracellular receptor within macrophages that 15-keto PGE<sub>2</sub> is thought to activate.



## Discussion

We have identified an unknown mechanism used by *C. neoformans* to manipulate host innate immunity whereby eicosanoids secreted by the fungus are able to manipulate the function of macrophages and promote fungal growth in the host through 15-keto PGE<sub>2</sub> and the host receptor PPAR- $\gamma$ .

We have previously identified that the *PLB1* gene deletion mutant  $\Delta plb1$  was deficient in replication and survival in macrophages (21), an observation also supported by a number of studies using different *in vitro* infection assays (19,23). In this study we have shown that the treating  $\Delta plb1$  infected macrophages with exogenous prostaglandin E<sub>2</sub> is sufficient to restore intracellular proliferation of  $\Delta plb1$ . During cryptococcal respiratory infection it has been observed that PGE<sub>2</sub> levels increase significantly in the lung (20). Our study identifies cryptococci as the source of PGE<sub>2</sub> and additionally it identifies the direct effect of PGE<sub>2</sub> on *Cryptococcus* intracellular proliferation, confirming PGE<sub>2</sub> as virulence factor required for growth in macrophages. As a PGE<sub>2</sub> is a phospholipase B1 dependent factor we hypothesised that co-infection would also be sufficient to recover intracellular growth in macrophages. Analysis of complementary ratios of mutant to parental strain numbers in co-infected macrophages demonstrated rescue, supporting our conclusion that cryptococcal derived PGE<sub>2</sub> is required for virulence.

A key goal of this study was to investigate how eicosanoids produced by *C. neoformans* may affect pathogenesis within a living host. We chose to use a zebrafish larvae model of cryptococcosis that our group has recently developed (22). To facilitate non-invasive fungal burden measurement within live larvae we created a GFP-tagged  $\Delta plb1$  strain with constitutive expression ( $\Delta plb1$ -GFP) to use alongside the GFP-tagged H99 parental strain we have previously produced (25). To our knowledge this is the first GFP tagged version of  $\Delta plb1$  created, and it also represents one of the only examples of a fluorescently tagged mutant *C. neoformans* strain. Characterisation of  $\Delta plb1$ -GFP using our zebrafish model of cryptococcosis revealed that this strain also has significantly reduced growth *in vivo* compared to H99-GFP, these findings confirm findings from a similar zebrafish cryptococcosis model which also found that  $\Delta plb1$  (non-fluorescent) had attenuated burden during larval infection (32).

To ascertain whether PGE<sub>2</sub> is also required for cryptococcal growth *in vivo* we treated zebrafish larvae infected with  $\Delta plb1$ -GFP or H99-GFP with exogenous PGE<sub>2</sub>. In agreement with our *in vitro* findings we

found that PGE<sub>2</sub> significantly improved the growth of *Δplb1-GFP* within larvae. Interestingly we also found that PGE<sub>2</sub> improved the growth of our H99-GFP parental control perhaps representing a wider manipulation of host immunity in *in vivo* infection. During larval infection, *C. neoformans* interacts closely with macrophages, it is therefore likely that the PGE<sub>2</sub> dependent growth observed in our *in vivo* model is due to host macrophage manipulation facilitated by *Cryptococcus* derived eicosanoids.

In vertebrate cells, PGE<sub>2</sub> is converted into 15-keto PGE<sub>2</sub> by the dehydrogenase enzyme 15-prostaglandin dehydrogenase (15PGDH). To determine whether the biological effect we observed with PGE<sub>2</sub> were affected by the conversion of to PGE<sub>2</sub> or 15-keto PGE<sub>2</sub> we treated infected larvae with 16,16 dm-PGE<sub>2</sub> – a synthetic variant of PGE<sub>2</sub> which is resistant to dehydrogenation (29). Interestingly we found that 16,16 dm-PGE<sub>2</sub> was not able to promote the growth of *Δplb1-GFP* or H99-GFP within infected larvae. These findings indicated that 15-keto PGE<sub>2</sub>, rather than PGE<sub>2</sub>, was the bioactive molecule during cryptococcal infection. To confirm these findings, we treated infected larvae with exogenous 15-keto-PGE<sub>2</sub> and found that 15-keto-PGE<sub>2</sub> treatment was sufficient to promote the growth of both *Δplb1-GFP* and H99-GFP without the need for PGE<sub>2</sub>. We propose that PGE<sub>2</sub> produced by *C. neoformans* is enzymatically dehydrogenated into 15-keto PGE<sub>2</sub>, as previously mentioned the vertebrate enzyme 15PGDH can convert PGE<sub>2</sub> into 15-keto PGE<sub>2</sub>, additionally it has been reported that *C. neoformans* itself has enzymatic activity analogous to 15PGDH (18), therefore it is possible that *C. neoformans* may produce both PGE<sub>2</sub> and 15-keto-PGE<sub>2</sub>. These findings represent the identification of a new virulence factor produced by *C. neoformans* as well as the first time that an eicosanoid other than PGE<sub>2</sub> has been identified as promoting cryptococcal growth. Furthermore, our findings suggest that previous studies which identify PGE<sub>2</sub> as a promoter of cryptococcal virulence (19,20,33) may have observed multiplicative effects from both PGE<sub>2</sub> and 15-keto PGE<sub>2</sub> activity.

The biological activity of 15-keto PGE<sub>2</sub> is far less studied than its parent species PGE<sub>2</sub>. 15-keto PGE<sub>2</sub> is unable to bind to the prostaglandin E<sub>2</sub> EP receptors which means that one of its physiological functions is to act as a negative regulator of PGE<sub>2</sub> activity i.e. cells up-regulate 15PGDH activity to lower PGE<sub>2</sub> levels (34). As our findings showed that 15-keto PGE<sub>2</sub> does have an effect during *C. neoformans* infection, we next sought the cellular receptor for 15-keto PGE<sub>2</sub>. With this in mind it has been demonstrated that 15-keto

PGE<sub>2</sub> is an agonist for the intracellular eicosanoid receptor peroxisome proliferator associated receptor gamma (PPAR-  $\gamma$ ) (30). PPAR-  $\gamma$  is a nuclear receptor normally found within the cytosol, upon ligand binding PPAR-  $\gamma$  forms a heterodimer with Retinoid X receptor (RXR) and translocates to the nucleus where it influences the expression of target genes which possess a peroxisome proliferation hormone response element (PPRE) (35).

Activation of PPAR-  $\gamma$  by *C. neoformans* has not been described previously but agrees with what we know of cryptococcal pathogenesis. PPAR-  $\gamma$  is an intracellular receptor found in many cell types including macrophages, if eicosanoids are being produced by *C. neoformans* during intracellular infection it is also likelier that they have bind to an eicosanoid receptor within the macrophage. Finally, activation of PPAR-  $\gamma$  promotes the expression of genes that are anti-inflammatory, and in macrophages PPAR-  $\gamma$  activation can lead to alternative activation. The growth promoting effects of 15-keto PGE<sub>2</sub> and the identification of PPAR-  $\gamma$  as a receptor for PPAR-  $\gamma$  led us to hypothesise that the effect of 15-keto PGE<sub>2</sub> could be mediated by PPAR-  $\gamma$  mediated activation of anti-inflammatory target genes. To establish whether PPAR-  $\gamma$  activation could promote the growth of *C. neoformans* in our zebrafish model we treated infected larvae with the drug troglitazone - a specific PPAR-  $\gamma$  agonist – at a concentration previously shown to activate PPAR-  $\gamma$  in zebrafish larvae. At this concentration we found that troglitazone was able to increase the growth of  $\Delta p/b1$ -GFP and H99-GFP during infection. Although these findings strongly suggest that the cryptococcal growth promoting effects of 15-keto PGE<sub>2</sub> may mediated via activation of PPAR-  $\gamma$ , further work will be needed to prove that the effects we observe when PPAR-  $\gamma$  is activated by troglitazone are due to the activity 15-keto PGE<sub>2</sub>.

In conclusion we have shown for the first time that synthesis of eicosanoids by *C. neoformans* is able to promote intracellular growth within macrophages and within an *in vivo* host. Additionally, we have uncovered a new virulence factor – 15-keto-PGE<sub>2</sub> – that is produced from PGE<sub>2</sub> during infection. We provide evidence for a possible mechanism for 15-keto PGE<sub>2</sub> via activation of PPAR-  $\gamma$  which is known to promote anti-inflammatory immune pathways. Finally, we have provided a potential new therapeutic pathway for treatment of cryptococcal infection as several eicosanoid modulating drugs are approved for patient treatment (36) .

## Materials and methods

(all reagents are from Sigma-Aldrich, UK unless otherwise stated)

## Ethics statement

Animal work was performed following UK law: Animal (Scientific Procedures) Act 1986, under Project License PPL 40/3574. Ethical approval was granted by the University of Sheffield Local Ethical Review Panel.

## Zebrafish

All zebrafish used in this study were the *Nacre* wild type strain. Zebrafish were maintained according to standard protocols. Adult fish were maintained on a 14:10 – hour light / dark cycle at 28 °C in UK Home Office approved facilities in the Bateson Centre aquaria at the University of Sheffield.

## *C. neoformans*

The H99-GFP has been previously described (25). The  $\Delta plb1$ -GFP was generated for this study by transforming existing deletion mutant strains  $\Delta plb1$  (23) with a GFP expression construct (see below for transformation protocol). All strains used are in the *C. neoformans* variety *grubii* H99 genetic background.

*Cryptococcus* strains were grown for 18 hours at 28 °C, rotating horizontally at 20 rpm. *Cryptococcus* cultures were pelleted at 3300g for 1 minute, washed twice with PBS (Oxoidm Basingstoke, UK) and re-suspended in 1ml PBS. Washed cells were then counted with a haemocytometer and used as described below.

### **C. neoformans transformation**

*C. neoformans* strains  $\Delta plb1$  was biolistically transformed using the pAG32\_GFP transformation construct as previously described for H99-GFP (25). Stable transformants were identified by passaging positive GFP fluorescent colonies for at least 3 passages on YPD agar supplemented with 250  $\mu$ g/ml Hygromycin B. Two stable  $\Delta plb1$ -GFP transformants were identified (#1-1 and #1-2), this study uses #1-2 as it was determined to be have the strongest and most homogenous GFP signal.

### **J774 Macrophage infection – with exogenous PGE<sub>2</sub> treatment**

J774 macrophage infection was performed as previously described (21) with the following alterations. J774 murine macrophage-like cells were cultured for a minimum of 4 passages in T75 tissue culture flasks at 37°C 5% CO<sub>2</sub> in DMEM (High glucose, Sigma) supplemented with 10% Fetal Bovine Calf Serum (Invitrogen), 1% 10,000 units Penicillin / 10 mg streptomycin and 1 % 200 mM L – glutamine, fully confluent cells were used for each experiment. Macrophages were counted by haemocytometer and diluted to a concentration of  $1 \times 10^5$  cells per ml in DMEM supplemented with 1  $\mu$ g/ml lipopolysaccharide (LPS from *E. coli*, Sigma L2630) before being plated into 24 well microplates (Greiner) and incubated for 24 hours (37 °C 5% CO<sub>2</sub>).

Following 24-hour incubation, medium was removed and replaced with 1 ml DMEM supplemented with 2 nM prostaglandin E<sub>2</sub> (CAY14010, 1mg/ml stock in 100% ethanol). Macrophage wells were then infected with 100  $\mu$ l  $1 \times 10^6$  yeast/ml *Cryptococcus* cells (from overnight culture, washed. See above) opsonized with anti-capsular IgG monoclonal antibody (18b7, a kind gift from Arturo Casadevall). Cells were incubated for 2 hours (37 °C 5% CO<sub>2</sub>) and then washed with 37 °C PBS until extracellular yeast were removed. After washing, infected cells were treated with 1ml DMEM supplemented with PGE<sub>2</sub>.

To calculate IPR, replicate wells for each treatment/strain were counted at 0 and 18 hours. Each well was washed once with 1ml 37 °C PBS prior to counting to remove any *Cryptococcus* cells released by macrophage death or vomocytosis. Intramacrophage Cryptococci were released by lysis with 200 µl dH<sub>2</sub>O for 20 minutes (lysis confirmed under microscope). Lysate was removed to a clean microcentrifuge tube and an additional 200 µl was used to wash the well to make a total lysate volume of 400 µl. *Cryptococcus* cells within lysates were counted by haemocytometer. IPR was calculated by dividing the total number of counted yeast at 18hr by the total at 0hr.

#### **J774 Macrophage co-infection.**

J774 cells were prepared and seeded at a concentration of  $1 \times 10^5$  per ml as above in 24 well microplates and incubated for 24 hours (37 °C 5% CO<sub>2</sub>), 45 minutes prior to infection J774 cells were activated with 150 ng/ml phorbol 12-myristate 13-acetate in DMSO added to 1 ml serum free DMEM. Following activation J774 cells were washed and infected with 100 µl /  $1 \times 10^6$  yeast/ml 50:50 mix of  $\Delta plb1$  (non-fluorescent) and H99-GFP (e.g.  $5 \times 10^5$   $\Delta plb1$  and  $5 \times 10^5$  H99-GFP). Infected cells were incubated for 2 hours (37 °C 5% CO<sub>2</sub>) to allow for phagocytosis of *Cryptococcus* and then washed multiple times with 37 °C PBS to remove unphagocytosed yeast, each well was observed between washes to ensure that macrophages were not being washed away. After washing 1 ml DMEM was added to each well.

Co-infected cells were imaged over 20 hours using a Nikon TE2000 microscope fitted with a climate controlled incubation chamber (37 °C 5% CO<sub>2</sub>) using a Digital Sight DS-QiMC camera and a Plan APO Ph1 20x objective lens (Nikon). GFP and bright field images were captured every 4 minutes for 20 hours. Co-infection movies were scored manually. Co-infected macrophages that contained 2  $\Delta plb1$  (non-fluorescent) and 1 H99-GFP (GFP positive) yeast cells at 0 hr were tracked for 18 hours and before the burden of each strain within the macrophage was counted

again. The IPR for  $\Delta plb1$  within co-infected macrophages was calculated by dividing the number of  $\Delta plb1$  cells within a macrophage at 18 hr by the number at 0 hr.

### **Zebrafish infection**

Washed and counted *Cryptococcus* cells were pelleted at 3300g for 1 minute and re-suspended in 10% Polyvinylpyrrolidone (PVP), 0.5% Phenol Red in PBS to give the required inoculum in 1 nl. This injection fluid was loaded into glass capillaries shaped with a needle puller for microinjection. Zebrafish larvae were injected at 2-days post fertilisation; the embryos were anaesthetised by immersion in 0.168 mg/ml tricaine in E3 before being transferred onto microscope slides coated with 3% methyl cellulose in E3 for injection. Prepared larvae were injected with two 0.5 nl boluses of injection fluid by compressed air into the yolk sac circulation valley. Following injection, larvae were removed from the glass slide and transferred to E3 to recover from anaesthetic and then transferred to fresh E3 to remove residual methyl cellulose. Successfully infected larvae (displaying systemic infection throughout the body and no visible signs of damage resulting from injection) were sorted using a fluorescent stereomicroscope. Infected larvae were maintained at 28 °C.

### **Eicosanoid / receptor agonist treatment of infected zebrafish larvae**

All compounds below were purchased from Cayman Chemical. Compounds were resuspended in DMSO and stored at -20 °C until used. Prostaglandin E<sub>2</sub> (CAY14010, 10mg/ml stock), Prostaglandin D<sub>2</sub> (CAY12010, 10mg/ml stock), 16,16-dimethyl PGE<sub>2</sub> (CAY14750, 10mg/ml stock), 15-keto PGE<sub>2</sub> (CAY14720, 10mg/ml stock) and troglitazone (CAY14720, 10mg/ml stock).

Treatment with exogenous compounds during larval infected was performed by adding compounds (or equivalent solvent) to fish water (E3) to achieve the desired concentration. Fish were immersed in compound supplemented E3 throughout the experiment from the time of injection.

## **Zebrafish fungal burden measurement**

Individual infected zebrafish embryos were placed into single wells of a 96 well plate (VWR) with 200 ul of E3 (unsupplemented E3, or E3 supplemented with eicosanoids / receptor agonist depending on the assay). Infected embryos were imaged at 0 days post infection (dpi), 1 dpi, 2 dpi and 3 dpi in their 96 well plates using a Nikon Ti-E with a CFI Plan Achromat UW 2X N.A 0.06 objective lens. Images were captured with a Neo sCMOS (Andor, Belfast, UK) and NIS Elements (Nikon, Richmond, UK). Images were exported from NIS Elements into Image J FIJI as monochrome tif files. Images were thresholded in FIJI using the 'moments' threshold preset and converted to binary images to remove all pixels in the image that did not correspond to the intensity of the fluorescently tagged *C. neoformans*. The outline of the embryo was traced using the 'polygon' ROI tool, avoiding autofluorescence from the yolk sac. The total number of pixels in the thresholded image were counted using the FIJI 'analyse particles' function, the 'total area' measurement from the 'summary' readout was used for the total number of GFP + pixels in each embryo.

## **Acknowledgments**

We thank the Bateson Centre aquaria staff for their assistance with zebrafish husbandry and the Johnston, Renshaw and Elks labs for critical discussions. We also thank Arturo Casadevall (Johns Hopkins University, Maryland USA) for providing the 18b7 antibody.

## **Author Information**

The experiments for this study were conceived by RJE, RCM, SAR and SAJ.

The experiments for this study were performed by RJE and SN.

Analysis was performed by RJE, SN and SAJ.

Generation of GFP strains was performed by RJE and EB.



409 The manuscript was written by RJE, RCM, SAR and SAJ. With feedback from EB and SN.

410

411

412

413

414

- 415 (1) Brown GD, Denning DW, Gow NA, Levitz SM, Netea MG, White TC. Hidden killers: human fungal  
416 infections. *Sci Transl Med* 2012 Dec 19;4(165):165rv13.
- 417 (2) Park BJ, Wannemuehler KA, Marston BJ, Govender N, Pappas PG, Chiller TM. Estimation of the  
418 current global burden of cryptococcal meningitis among persons living with HIV/AIDS. *AIDS* 2009  
419 Feb;23:525-530.
- 420 (3) Ma H, May RC. Chapter 5 Virulence in *Cryptococcus* Species. In: Allen I. Laskin, Sima Sariaslani and  
421 Geoffrey M. Gadd, editor. : Academic Press; 2009. p. 131-190.
- 422 (4) Gibson JF, Johnston SA. Immunity to *Cryptococcus neoformans* and *C. gattii* during cryptococcosis.  
423 *Fungal Genet Biol* 2015 May;78:76-86.
- 424 (5) Kawakami K, Kohno S, Kadota J, Tohyama M, Teruya K, Kudeken N, et al. T cell-dependent  
425 activation of macrophages and enhancement of their phagocytic activity in the lungs of mice inoculated  
426 with heat-killed *Cryptococcus neoformans*: involvement of IFN-gamma and its protective effect against  
427 cryptococcal infection. *Microbiol Immunol* 1995;39(2):135-143.
- 428 (6) Voelz K, Lammas DA, May RC. Cytokine signaling regulates the outcome of intracellular macrophage  
429 parasitism by *Cryptococcus neoformans*. *Infect Immun* 2009 Aug;77(8):3450-3457.
- 430 (7) Leopold Wager CM, Hole CR, Wozniak KL, Olszewski MA, Wormley FL, Jr. STAT1 signaling is  
431 essential for protection against *Cryptococcus neoformans* infection in mice. *J Immunol* 2014 Oct  
432 15;193(8):4060-4071.
- 433 (8) Chrétien F, Lortholary O, Kansau I, Neuville S, Gray F, Dromer F. Pathogenesis of cerebral  
434 *Cryptococcus neoformans* infection after fungemia. *J Infect Dis* 2002 Aug;186:522-530.
- 435 (9) Charlier C, Nielsen K, Daou S, Brigitte M, Chretien F, Dromer F. PMC2612285; Evidence of a role for  
436 monocytes in dissemination and brain invasion by *Cryptococcus neoformans*. *Infect Immun* 2009  
437 Jan;77:120-127.
- 438 (10) Norris PC, Reichart D, Dumlao DS, Glass CK, Dennis EA. Specificity of eicosanoid production  
439 depends on the TLR-4-stimulated macrophage phenotype. *J Leukoc Biol* 2011 Sep;90(3):563-574.
- 440 (11) Gupta S, Maurya MR, Stephens DL, Dennis EA, Subramaniam S. An integrated model of eicosanoid  
441 metabolism and signaling based on lipidomics flux analysis. *Biophys J* 2009 Jun 3;96(11):4542-4551.
- 442 (12) Harizi H. The immunobiology of prostanoid receptor signaling in connecting innate and adaptive  
443 immunity. *Biomed Res Int* 2013;2013:683405.
- 444 (13) Angeli V, Faveeuw C, Roye O, Fontaine J, Teissier E, Capron A, et al. Role of the parasite-derived  
445 prostaglandin D2 in the inhibition of epidermal Langerhans cell migration during schistosomiasis infection.  
446 *J Exp Med* 2001 May 21;193(10):1135-1147.
- 447 (14) Ahmadi M, Emery DC, Morgan DJ. Prevention of both direct and cross-priming of antitumor CD8+ T-  
448 cell responses following overproduction of prostaglandin E2 by tumor cells in vivo. *Cancer Res* 2008 Sep  
449 15;68(18):7520-7529.
- 450 (15) Harizi H, Corcuff JB, Gualde N. Arachidonic-acid-derived eicosanoids: roles in biology and  
451 immunopathology. *Trends Mol Med* 2008 Oct;14:461-469.

- 452 (16) Noverr MC, Erb-Downward JR, Huffnagle GB. Production of eicosanoids and other oxylipins by  
453 pathogenic eukaryotic microbes. Clin Microbiol Rev 2003 Jul;16(3):517-533.
- 454 (17) Erb-Downward JR, Huffnagle GB. Cryptococcus neoformans produces authentic prostaglandin E2  
455 without a cyclooxygenase. Eukaryot Cell 2007 Feb;6(2):346-350.
- 456 (18) Erb-Downward JR, Noggle RM, Williamson PR, Huffnagle GB. The role of laccase in prostaglandin  
457 production by Cryptococcus neoformans. Mol Microbiol 2008 Jun;68(6):1428-1437.
- 458 (19) Noverr MC, Cox GM, Perfect JR, Huffnagle GB. PMC148814; Role of PLB1 in pulmonary  
459 inflammation and cryptococcal eicosanoid production. Infect Immun 2003 Mar;71:1538-1547.
- 460 (20) Shen L, Liu Y. Prostaglandin E2 blockade enhances the pulmonary anti-Cryptococcus neoformans  
461 immune reaction via the induction of TLR-4. Int Immunopharmacol 2015 Sep;28(1):376-381.
- 462 (21) Evans RJ, Li Z, Hughes WS, Djordjevic JT, Nielsen K, May RC. Cryptococcal Phospholipase B1  
463 (Plb1) is required for intracellular proliferation and control of titan cell morphology during macrophage  
464 infection. Infect Immun 2015 Jan 20.
- 465 (22) Bojarczuk A, Miller KA, Hotham R, Lewis A, Ogryzko NV, Kamuyango AA, et al. Cryptococcus  
466 neoformans Intracellular Proliferation and Capsule Size Determines Early Macrophage Control of  
467 Infection. Sci Rep 2016 Feb 18;6:21489.
- 468 (23) Cox GM, McDade HC, Chen SC, Tucker SC, Gottfredsson M, Wright LC, et al. Extracellular  
469 phospholipase activity is a virulence factor for Cryptococcus neoformans. Mol Microbiol 2001 Jan;39:166-  
470 175.
- 471 (24) Voelz K, Johnston SA, Smith LM, Hall RA, Idnurm A, May RC. 'Division of labour' in response to host  
472 oxidative burst drives a fatal Cryptococcus gattii outbreak. Nat Commun 2014 Oct 17;5:5194.
- 473 (25) Voelz K, Johnston SA, Rutherford JC, May RC. Automated analysis of cryptococcal macrophage  
474 parasitism using GFP-tagged cryptococci. PLoS One 2010 Dec 31;5(12):e15968.
- 475 (26) Feng Y, Renshaw S, Martin P. Live imaging of tumor initiation in zebrafish larvae reveals a trophic  
476 role for leukocyte-derived PGE(2). Curr Biol 2012 Jul 10;22(13):1253-1259.
- 477 (27) North TE, Goessling W, Walkley CR, Lengerke C, Kopani KR, Lord AM, et al. Prostaglandin E2  
478 regulates vertebrate haematopoietic stem cell homeostasis. Nature 2007 Jun 21;447(7147):1007-1011.
- 479 (28) Chayakulkeeree M, Johnston SA, Oei JB, Lev S, Williamson PR, Wilson CF, et al. SEC14 is a  
480 specific requirement for secretion of phospholipase B1 and pathogenicity of Cryptococcus neoformans.  
481 Mol Microbiol 2011 May;80:1088-1101.
- 482 (29) Ohno H, Morikawa Y, Hirata F. Studies on 15-hydroxyprostaglandin dehydrogenase with various  
483 prostaglandin analogues. J Biochem 1978 Dec;84(6):1485-1494.
- 484 (30) Chou WL, Chuang LM, Chou CC, Wang AH, Lawson JA, FitzGerald GA, et al. Identification of a  
485 novel prostaglandin reductase reveals the involvement of prostaglandin E2 catabolism in regulation of  
486 peroxisome proliferator-activated receptor gamma activation. J Biol Chem 2007 Jun 22;282(25):18162-  
487 18172.
- 488 (31) Tiefenbach J, Moll PR, Nelson MR, Hu C, Baev L, Kislinger T, et al. A live zebrafish-based screening  
489 system for human nuclear receptor ligand and cofactor discovery. PLoS One 2010 Mar 22;5(3):e9797.

490 (32) Tenor JL, Oehlers SH, Yang JL, Tobin DM, Perfect JR. Live Imaging of Host-Parasite Interactions in  
491 a Zebrafish Infection Model Reveals Cryptococcal Determinants of Virulence and Central Nervous  
492 System Invasion. MBio 2015 Sep 29;6(5):e01425-15.

493 (33) Valdez PA, Vithayathil PJ, Janelsins BM, Shaffer AL, Williamson PR, Datta SK. Prostaglandin E2  
494 suppresses antifungal immunity by inhibiting interferon regulatory factor 4 function and interleukin-17  
495 expression in T cells. Immunity 2012 Apr 20;36(4):668-679.

496 (34) Coggins KG, Latour A, Nguyen MS, Audoly L, Coffman TM, Koller BH. Metabolism of PGE2 by  
497 prostaglandin dehydrogenase is essential for remodeling the ductus arteriosus. Nat Med 2002  
498 Feb;8(2):91-92.

499 (35) Lemberger T, Desvergne B, Wahli W. Peroxisome proliferator-activated receptors: a nuclear receptor  
500 signaling pathway in lipid physiology. Annu Rev Cell Dev Biol 1996;12:335-363.

501 (36) Day RO, Graham GG. Non-steroidal anti-inflammatory drugs (NSAIDs). BMJ 2013 Jun 11;346:f3195.

502

503

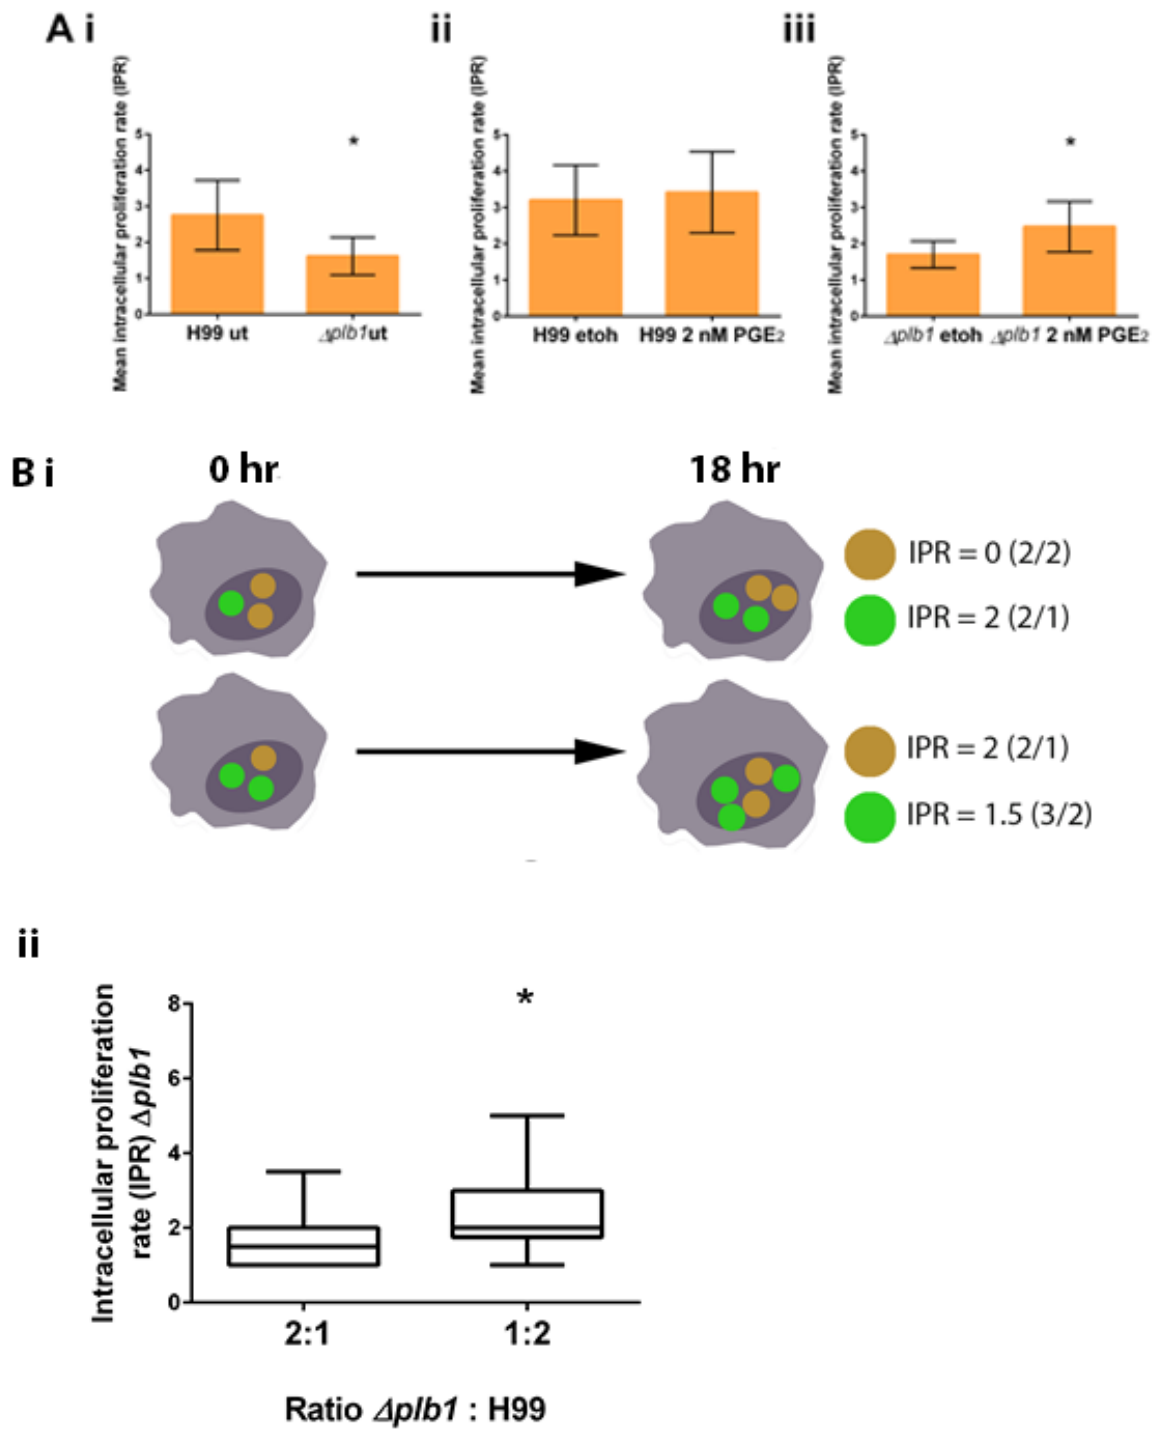

504

505

# **Fig1**

**The intracellular proliferation defect of the *C. neoformans* mutant  $\Delta plb1$ , can be reversed with the addition of exogenous prostaglandin E<sub>2</sub>.** **A** J774 murine macrophages were infected with  $\Delta plb1$  or the parental strain H99. Infected cells were left untreated **(i)** or treated with 2 nM PGE<sub>2</sub> **(ii)** or an equivalent solvent (ethanol) control **(iii)**. Mean IPR from 5 biological repeats shown with error bars representing standard deviation. An unpaired two tailed Student's t-test was performed to compare each treatment group. **(i)** \* p = 0.0303 **(ii)** ns p = 0.7212 **(iii)** \* p = 0.0376. **B** J774 cells co-infected with a 50:50 mix of  $\Delta plb1$  and H99-GFP. **i** Diagrammatic representation of co-infection experiment. GFP<sup>+</sup> (green) and GFP<sup>-</sup> (yellow) *C. neoformans* cells within the phagosome were quantified at 0 hr, macrophages with a burden ratio of 1:2 or 2:1 were reanalysed at 18 hr, the IPR for  $\Delta plb1$  within 2:1 and 1:2 co-infected cells was calculated by dividing the burden at 18hr by burden at 0 hr for GFP<sup>+</sup> (green) or GFP<sup>-</sup> (yellow) cells. **ii** Quantification of IPR for  $\Delta plb1$  cells within  $\Delta plb1$ :H99-GFP 2:1 or 1:2 co-infected macrophages. At least 38 co-infected macrophages were analysed for each condition over 4 experimental repeats. Student's T test performed to compare ratios – 2:1 vs 1:2 \* p = 0.0137.

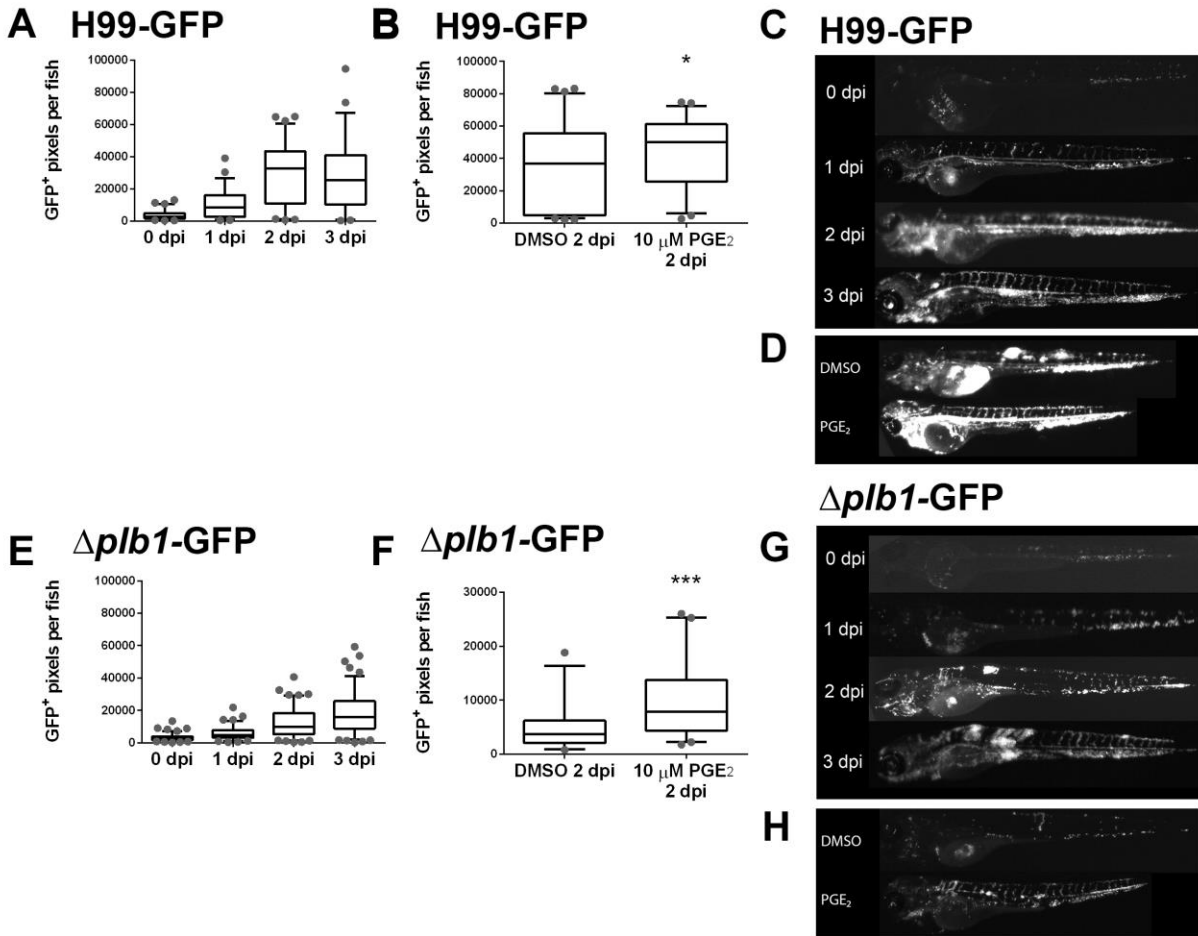

521

522

## Fig2

**The prostaglandin E<sub>2</sub> dependent growth defect of *Δplb1* is also present *in vivo*:** **A** H99-GFP infected larvae imaged at 0, 1, 2 and 3 dpi. At least 50 larvae measured per time point from 3 biological repeats. Box and whiskers show median, 5<sup>th</sup> percentile and 95<sup>th</sup> percentile. Unpaired Mann-Whitney U tests used to compare the burden between each strain for every time point, for p values see (Supplementary Fig1). **B** – H99-GFP Infected larvae treated with 10 μM prostaglandin E<sub>2</sub> or equivalent solvent (DMSO) control. At least 60 larvae measured per treatment group from 3 biological repeats. Box and whiskers show median, 5<sup>th</sup> percentile and 95<sup>th</sup> percentile. Unpaired Mann-Whitney U tests used to compare between treatments DMSO vs. 10 μM PGE<sub>2</sub> \* p = 0.0137 (threshold for significance 0.017, corrected for multiple comparisons). **C,D** Representative GFP images (representative = median value) of 2dpi H99-GFP infected larvae, untreated at 0,1,2,3 dpi (**C**) or H99-GFP infected larvae with 10 μM PGE<sub>2</sub> at 2dpi (**D**). **E** *Δplb1-GFP* infected larvae (500 cell inoculum injected at 2 dpf) imaged at 0, 1, 2 and 3 dpi. N = 3. Box and whiskers show median, 5<sup>th</sup> percentile and 95<sup>th</sup> percentile. At least 87 larvae measured for each timepoint from 3 biological repeats. Unpaired Mann-Whitney U tests used to compare the burden between each strain for every time point, for p values see (Supplementary table 1). **F** – *Δplb1-GFP* Infected larvae treated with 10 μM prostaglandin E<sub>2</sub> or equivalent solvent (DMSO) control. At least 38 larvae measured per treatment group from 2 biological repeats. Box and whiskers show median, 5<sup>th</sup> percentile and 95<sup>th</sup> percentile. Unpaired Mann-Whitney U tests used to compare between treatments *Δplb1-GFP* DMSO vs 10 μM PGE<sub>2</sub> \*\*\* p = 0.0001 (threshold for significance 0.017, corrected for multiple comparisons). **G,H** Representative GFP images (representative = median value) of 2dpi *Δplb1-GFP* infected larvae, untreated at 0,1,2,3 dpi (**G**) or *Δplb1-GFP* infected larvae with 10 μM PGE<sub>2</sub> at 2dpi (**H**).



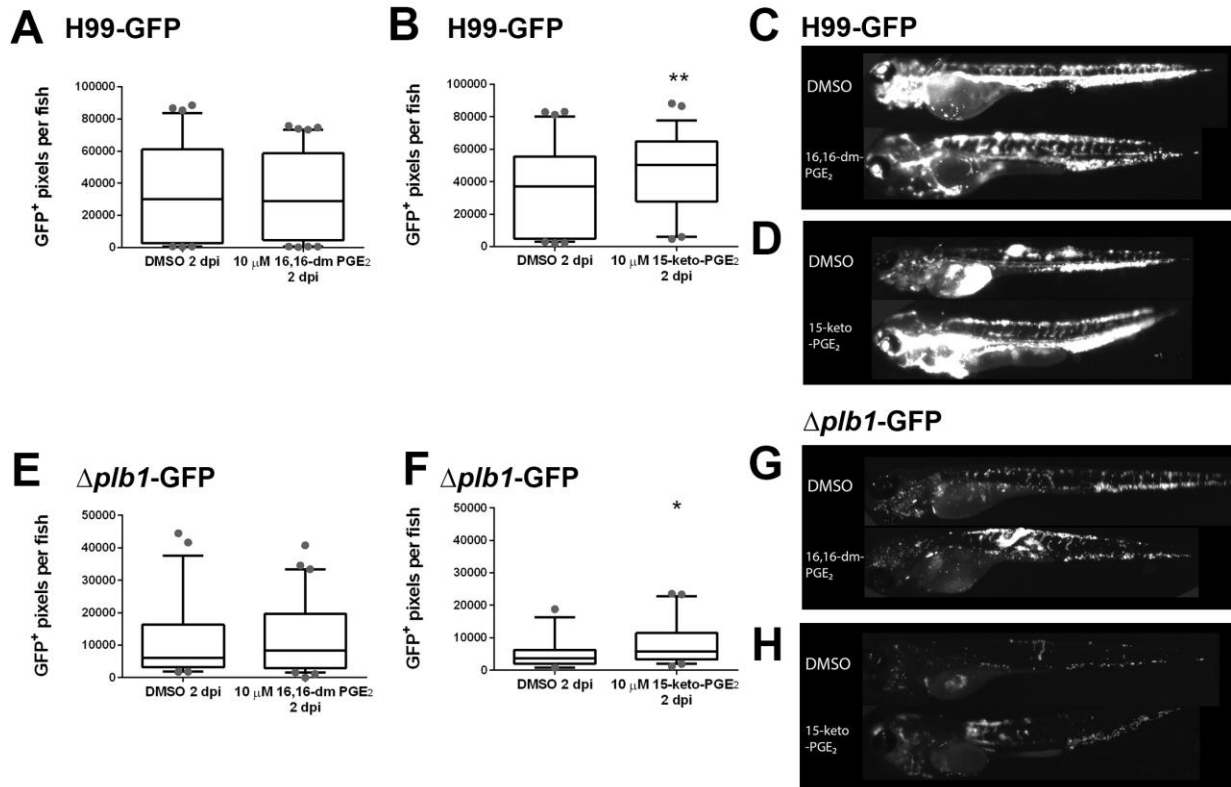

546

### Fig3

**The observed activity of PGE<sub>2</sub> is due to its dehydrogenated derivative 15-keto PGE:** Fungal burden measured at 2 days post infection (2 dpi) by counting GFP positive pixels in each larvae. **A** H99-GFP Infected larvae treated with 10  $\mu$ M 16,16-dimethyl prostaglandin E<sub>2</sub> or equivalent solvent (DMSO) control. At least 75 larvae measured per treatment group from 4 biological repeats. Box and whiskers show median, 5<sup>th</sup> percentile and 95<sup>th</sup> percentile. Unpaired Mann-Whitney U test used to compare between treatments, DMSO vs. 10  $\mu$ M 16, 16-dm PGE<sub>2</sub> ns p = 0.9954. **B** H99-GFP Infected larvae treated with 10  $\mu$ M 15-keto prostaglandin E<sub>2</sub> or equivalent solvent (DMSO) control. At least 55 larvae measured per treatment group from 3 biological repeats. Unpaired Mann-Whitney U test used to compare between treatments DMSO vs. 10  $\mu$ M 15-keto PGE<sub>2</sub> \*\* p = 0.0048 (threshold for significance 0.017, corrected for multiple comparisons). **C,D** Representative GFP images (representative = median value) of 2dpi H99-GFP infected larvae with 10  $\mu$ M 16, 16-dimethyl prostaglandin E<sub>2</sub> (**C**) or 10  $\mu$ M 15-keto prostaglandin E<sub>2</sub> (**D**). **E**  $\Delta plb1$ -GFP Infected larvae treated with 10  $\mu$ M 16, 16-dimethyl prostaglandin E<sub>2</sub> or equivalent solvent (DMSO) control. At least 45 larvae per treatment group from 3 biological repeats. Unpaired Mann-Whitney U test used to compare between treatments  $\Delta plb1$ -GFP DMSO vs 10  $\mu$ M 16, 16-dm PGE<sub>2</sub> ns p = 0.9782. **F**  $\Delta plb1$ -GFP Infected larvae treated with 10  $\mu$ M 15-keto prostaglandin E<sub>2</sub> or equivalent solvent (DMSO) control. At least 38 larvae measured per treatment group from 2 biological repeats. Unpaired Mann-Whitney U test used to compare between treatments DMSO vs 10  $\mu$ M 15-keto PGE<sub>2</sub> \* p = 0.0119 (threshold for significance 0.017, corrected for multiple comparisons).. **G,H** Representative GFP images (representative = median value) of 2dpi  $\Delta plb1$ -GFP infected larvae with 10  $\mu$ M 16,16-dm PGE<sub>2</sub> (**G**) or 10  $\mu$ M 15-keto PGE<sub>2</sub> (**H**)

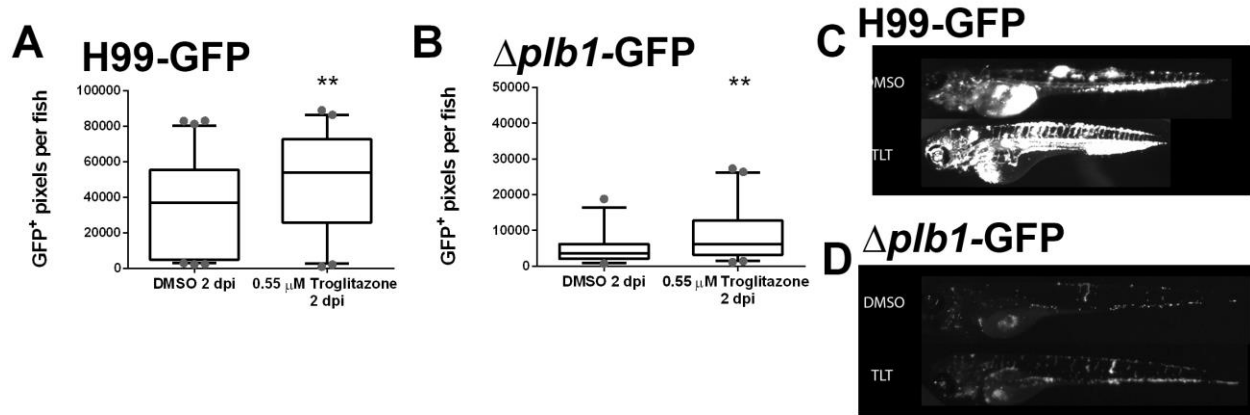

568

# **Fig4**

**15-keto PGE<sub>2</sub> may promote fungal burden by activating host PPAR- $\gamma$ .** 2 day old (2 dpf) *Nacre* zebrafish larvae injected with 500 cell inoculum. Fungal burden measured at 2 days post infection (2 dpi) by counting GFP positive pixels within each larvae. **A** H99-GFP Infected larvae treated with 0.55  $\mu$ M Troglitazone (TLT) equivalent solvent (DMSO) control. Box and whiskers show median, 5<sup>th</sup> percentile and 95<sup>th</sup> percentile. At least 55 larvae measured per treatment group over 3 biological repeats. Mann-Whitney U test used to compare between treatments, DMSO vs. 0.55  $\mu$ M Troglitazone \*\* p = 0.0044. **B**  $\Delta$ *plb1*-GFP infected larvae treated with 0.55  $\mu$ M Troglitazone (TLT) equivalent solvent (DMSO) control. Box and whiskers show median, 5<sup>th</sup> percentile and 95<sup>th</sup> percentile. At least 39 larvae measured per treatment group from 2 biological repeats. Mann-Whitney U test used to compare between treatments, DMSO vs. 0.55  $\mu$ M Troglitazone \*\* p = 0.0089. **C,D** Representative GFP images (representative = median value) of 2dpi H99-GFP infected larvae with 0.55  $\mu$ M TLT (**C**) or  $\Delta$ *plb1*-GFP infected larvae with 0.55  $\mu$ M TLT (**D**)

**A**

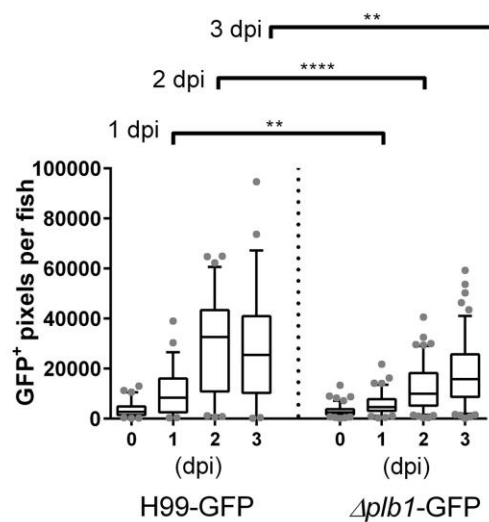

**B**

| DPI (H99-GFP vs. $\Delta plb1$ -GFP) | P value         |
|--------------------------------------|-----------------|
| 0                                    | ns p = 0.4980   |
| 1                                    | ** p = 0.0095   |
| 2                                    | *** p = <0.0001 |
| 3                                    | ** p = 0.0013   |

581

582

## Supplementary Fig 1

**Comparison of fungal burden between H99-GFP and  $\Delta plb1$ -GFP infected larvae A** (Data reproduced from Fig2 A and E for clarity) H99-GFP and  $\Delta plb1$ -GFP infected larvae imaged at 0, 1, 2 and 3 dpi. At least 50 larvae measured per time point from 3 biological repeats. Box and whiskers show median, 5<sup>th</sup> percentile and 95<sup>th</sup> percentile. Unpaired Mann-Whitney U tests used to compare the burden between each strain for every time point. **B** Results of Mann-Whitney U tests comparing burden between
