1 **15-keto-prostaglandin E<sub>2</sub> activates host peroxisome proliferator-activated receptor**  
2 **gamma (PPAR-γ) to promote *Cryptococcus neoformans* growth during infection.**

3

4 **Authors:**

5 **Robert J. Evans<sup>1,2</sup>, Katherine Pline<sup>1,2</sup>, Catherine A. Loynes<sup>1,2</sup>, Sarah Needs<sup>3</sup>, Maceler**  
6 **Aldrovandi<sup>4</sup>, Jens Tiefenbach<sup>5</sup>, Ewa Bielska<sup>3</sup>, Rachel E. Rubino<sup>6</sup>, Christopher J. Nicol<sup>6</sup>,**  
7 **Robin C. May<sup>3</sup>, Henry M. Krause<sup>5</sup>, Valerie B. O'Donnell<sup>4</sup>, Stephen A. Renshaw<sup>1,2</sup>, Simon A.**  
8 **Johnston<sup>1,2</sup>**

9

10 <sup>1</sup> Bateson Centre, Firth Court, University of Sheffield, S10 2TN, UK.

11 <sup>2</sup> Department of Infection, Immunity and Cardiovascular Disease, Medical School, University of  
12 Sheffield, S10 2RX, UK.

13 <sup>3</sup> Institute of Microbiology and Infection, School of Biosciences, University of Birmingham,  
14 Birmingham, B15 2TT, UK.

15 <sup>4</sup> Systems Immunity Research Institute, and Division of Infection and Immunity, School of  
16 Medicine, Cardiff University, Cardiff CF14 4XN, UK

17 <sup>5</sup> Banting and Best Department of Medical Research, The Terrence Donnelly Centre for Cellular  
18 and Biomolecular Research (CCBR), University of Toronto, Toronto, Ontario, Canada, InDanio  
19 Bioscience Inc., Toronto, Ontario, Canada

20 <sup>6</sup> Department of Pathology and Molecular Medicine, Queen's University, Kingston, ON, Canada.

21

22 Running Title: Fungal derived 15-keto-prostaglandin E<sub>2</sub> and PPAR-γ promote *C. neoformans*  
23 infection

24 \*Author for correspondence: Simon A. Johnston

25 Email: s.a.johnston@sheffield.ac.uk



27 **Abstract**

28 *Cryptococcus neoformans* is one of the leading causes of invasive fungal infection in humans  
29 worldwide. *C. neoformans* uses macrophages as a proliferative niche to increase infective  
30 burden and avoid immune surveillance. However, the specific mechanisms by which *C.*  
31 *neoformans* manipulates host immunity to promote its growth during infection remain ill-defined.  
32 Here we demonstrate that eicosanoid lipid mediators manipulated and/or produced by *C.*  
33 *neoformans* play a key role in regulating pathogenesis. *C. neoformans* is known to secrete  
34 several eicosanoids that are highly similar to those found in vertebrate hosts. Using eicosanoid  
35 deficient cryptococcal mutants  $\Delta plb1$  and  $\Delta lac1$ , we demonstrate that prostaglandin E<sub>2</sub> is  
36 required by *C. neoformans* for proliferation within macrophages and *in vivo* during infection.  
37 Genetic and pharmacological disruption of host PGE<sub>2</sub> synthesis is not required for promotion of  
38 cryptococcal growth by eicosanoid production. We find that PGE<sub>2</sub> must be dehydrogenated into  
39 15-keto-PGE<sub>2</sub> to promote fungal growth, a finding that implicated the host nuclear receptor  
40 PPAR- $\gamma$ . *C. neoformans* infection of macrophages activates host PPAR- $\gamma$  and its inhibition is  
41 sufficient to abrogate the effect of 15-keto-PGE<sub>2</sub> in promoting fungal growth during infection.  
42 Thus, we describe the first mechanism of reliance on pathogen-derived eicosanoids in fungal  
43 pathogenesis and the specific role of 15-keto-PGE<sub>2</sub> and host PPAR- $\gamma$  in cryptococcosis.

44

45 **Author Summary:**

46 *Cryptococcus neoformans* is an opportunistic fungal pathogen that is responsible for significant  
47 numbers of deaths in the immunocompromised population worldwide. Here we address whether  
48 eicosanoids produced by *C. neoformans* manipulate host innate immune cells during infection.  
49 *Cryptococcus neoformans* produces several eicosanoids that are notable for their similarity to  
50 vertebrate eicosanoids, it is therefore possible that fungal-derived eicosanoids may provoke  
51 physiological effects in the host. Using a combination of *in vitro* and *in vivo* infection models we  
52 identify a specific eicosanoid species - prostaglandin E<sub>2</sub> – that is required by *C. neoformans* for

53 growth during infection. We subsequently show that prostaglandin E<sub>2</sub> must be converted to 15-  
54 keto-prostaglandin E<sub>2</sub> within the host before it has these effects. Furthermore, we find that  
55 prostaglandin E<sub>2</sub>/15-keto-prostaglandin E<sub>2</sub> mediated virulence is via activation of host PPAR-γ –  
56 an intracellular eicosanoid receptor known to interact with 15-keto-PGE<sub>2</sub>.

## 57 **Introduction**

58 *Cryptococcus neoformans* is an opportunistic pathogen that infects individuals who have severe  
59 immunodeficiencies such as late-stage HIV AIDS. *C. neoformans* is estimated to infect 278,000  
60 individuals each year resulting in 181,000 deaths (1,2). *C. neoformans* infection begins in the  
61 lungs where the fungus is phagocytosed by host macrophages. Macrophages must become  
62 activated by further inflammatory signals from the host immune system before they can  
63 effectively kill *C. neoformans* (3,4). When this does not occur *C. neoformans* proliferates rapidly  
64 intracellularly and may use the macrophage to disseminate to the central nervous system  
65 leading to fatal cryptococcal meningitis (5-9).

66  
67 Eicosanoids are an important group of lipid inflammatory mediators produced by innate immune  
68 cells such as macrophages. Eicosanoids are a diverse group of potent signalling molecules that  
69 have a short range of action and signal through autocrine and paracrine routes. Macrophages  
70 produce large amounts of a particular group of eicosanoids called prostaglandins during  
71 microbial infection (10,11). Prostaglandins have a number of physiological effects throughout  
72 the body, but in the context of immunity they are known to strongly influence the inflammatory  
73 state (12). The prostaglandins PGE<sub>2</sub> and PGD<sub>2</sub> are the best-studied eicosanoid inflammatory  
74 mediators. During infection, macrophages produce both PGE<sub>2</sub> and PGD<sub>2</sub> to which, via autocrine  
75 routes, they are highly responsive (12). In vertebrate immunity, the synthesis of eicosanoids  
76 such as PGE<sub>2</sub> is carefully regulated by feedback loops to ensure that the potent effects of these  
77 molecules are properly constrained. Exogenous sources of eicosanoids within the body, such as

78 from eicosanoid-producing parasites (13) or tumours that overproduce eicosanoids (14,15), can  
79 disrupt host inflammatory signaling as they are not subject to the same regulation.

80

81 It is well known that *C. neoformans* produces its own eicosanoid species. These fungal-derived  
82 eicosanoids are indistinguishable from those produced by vertebrates (16-18). Only two  
83 *Cryptococcus* enzymes are known to be associated with cryptococcal eicosanoid synthesis -  
84 phospholipase B1 and laccase (18,19). Deletion of phospholipase B1 reduces secreted levels of  
85 all eicosanoids produced by *C. neoformans* suggesting that it has high level role in eicosanoid  
86 synthesis (19), perhaps fulfilling the role of phospholipase A<sub>2</sub> in higher organisms. Deletion of  
87 laccase results in reduced levels of PGE<sub>2</sub> but other eicosanoids are unaffected suggesting that  
88 laccase has putative PGE<sub>2</sub> synthase activity (18). *C. neoformans* produces eicosanoids during  
89 infection, these eicosanoids are indistinguishable from host eicosanoids so it is possible that *C.*  
90 *neoformans* is able to manipulate the host inflammatory state during infection by directly  
91 manipulating host eicosanoid signaling.

92

93 It has previously been reported that the inhibition of prostaglandin E<sub>2</sub> receptors EP2 and EP4  
94 during murine pulmonary infection leads to better host survival accompanied by a shift towards  
95 Th1/M1 macrophage activation, however it was not determined if PGE<sub>2</sub> was derived from the  
96 host or the fungus (20). Therefore, a key aspect of *C. neoformans* pathogenesis remains  
97 unanswered: do eicosanoids produced by *C. neoformans* manipulate host innate immune cells  
98 function during infection?

99

100 We have previously shown that the eicosanoid deficient strain  $\Delta plb1$  has reduced proliferation  
101 and survival within macrophages (21). We hypothesised that eicosanoids produced by *C.*  
102 *neoformans* support intracellular proliferation within macrophages and subsequently promote  
103 pathogenesis. To address this hypothesis, we combined *in vitro* macrophage infection assays

104 with our previous published *in vivo* zebrafish model of cryptococcosis (22). We found that PGE<sub>2</sub>  
105 was sufficient to promote growth of  $\Delta plb1$  and  $\Delta lac1$  independent of host PGE<sub>2</sub> production, *in*  
106 *vitro* and *in vivo*. We show that the effects of PGE<sub>2</sub> in cryptococcal infection are mediated by its  
107 dehydrogenated form, 15-keto-PGE<sub>2</sub>. Finally, we determine that 15-keto-PGE<sub>2</sub> promotes *C.*  
108 *neoformans* infection via the activation of the host nuclear transcription factor PPAR- $\gamma$ ,  
109 demonstrating that 15-keto-PGE<sub>2</sub> and PPAR- $\gamma$  are new factors in cryptococcal infection

110

## 111 **Results**

### 112 *Prostaglandin E<sub>2</sub> is required for C. neoformans growth in macrophages*

113 We have previously shown that the *C. neoformans* mutant strain  $\Delta plb1$  has impaired  
114 proliferation and survival within J774 murine macrophages *in vitro* (21). The  $\Delta plb1$  strain has a  
115 deletion in the *PLB1* gene which codes for the secreted enzyme phospholipase B1 (23). The  
116  $\Delta plb1$  strain is known to produce lower levels of fungal eicosanoids indicating that  
117 phospholipase B1 is involved in fungal eicosanoid synthesis (19). It has been proposed that the  
118 attenuation of this strain within macrophages could be because it cannot produce eicosanoids  
119 (19). A previous study has identified PGE<sub>2</sub> as an eicosanoid that promotes cryptococcal  
120 virulence and manipulates macrophage activation, however this study did not determine if PGE<sub>2</sub>  
121 was produced by the host or *C. neoformans* (20). We hypothesised that PGE<sub>2</sub> - or other  
122 phospholipase B1 derived eicosanoid species - are produced by *C. neoformans* during infection  
123 and promote macrophage infection.

124 To test if PGE<sub>2</sub> promotes the intracellular growth of *C. neoformans* we treated  $\Delta plb1$  infected  
125 J774 macrophages with exogenous PGE<sub>2</sub> and measured intracellular proliferation over 18  
126 hours. The addition of exogenous PGE<sub>2</sub> to J774 macrophages infected with  $\Delta plb1$  was sufficient  
127 to recover the intracellular proliferation of  $\Delta plb1$  compared to the H99 (parental wild type strain)

128 and  $\Delta plb1:PLB1$  (reconstituted strain) strains (Fig 1  $p=0.038$ ). These findings support our initial  
129 hypothesis and identify  $PGE_2$  as a mediator of cryptococcal virulence during macrophage  
130 infection.

131 We have previously shown that  $\Delta plb1$  has reduced intracellular proliferation due to a  
132 combination of reduced cell division and reduced viability within the phagosome (21). In our  
133 intracellular proliferation assay the number of intracellular *Cryptococcus* cells is quantified by  
134 lysing infected macrophage and counting the number of *Cryptococcus* cells with a  
135 hemocytometer. Due to their structurally stable fungal cell wall dead or dying *Cryptococcus* cells  
136 do not look noticeably different on a hemocytometer from viable cells. To quantify the viability of  
137 *Cryptococcus* cells retrieved from the phagosome we diluted the lysate to give an expected  
138 number of CFUs (in this case 200 CFU), spread the diluted lysate on YPD agar and count the  
139 actual number of CFUs produced – a difference between the expected CFU count (200 CFU)  
140 and the actual CFU count indicates a loss of *Cryptococcus* cell viability. In this case viability  
141 assays showed that exogenous  $PGE_2$  produced no significant increase in the viability of  $\Delta plb1$   
142 cells within the phagosome (Supplementary Fig 1A).

#### 143 *Exogenous prostaglandin E<sub>2</sub> rescues in vivo growth of $\Delta plb1$ -GFP*

144  
145 Our *in vitro* data showed that  $PGE_2$  promotes the intracellular proliferation of *C. neoformans*  
146 within macrophages. First, we injected 2-day post fertilisation (dpf) zebrafish larvae with  $\Delta plb1$ -  
147 GFP (a constitutively expressed GFP tagged version of the  $\Delta plb1$  generated for this study). One  
148 of the advantages of this model is that the fungal burden can be non-invasively imaged within  
149 infected larvae using fluorescently tagged *C. neoformans* strains and we able measure the  
150 growth of the fungus at 1-, 2- and 3-days post-infection (dpi). We found that  $\Delta plb1$ -GFP infected  
151 larvae had significantly lower fungal burdens at 1, 2- and 3-days post infection (Fig 2D and  
152 Supplementary Fig 1B) compared to the parental strain H99-GFP (Fig 2A and Supplementary

153 Fig 1B). These data demonstrated that the  $\Delta plb1$ -GFP mutant had a similar growth deficiency to  
154 our *in vitro* phenotype and with previous studies (21,23,24). To confirm that PGE<sub>2</sub> promotes  
155 cryptococcal infection *in vivo* we infected zebrafish larvae with  $\Delta plb1$ -GFP or H99-GFP and  
156 treated the larvae with exogenous PGE<sub>2</sub>. In agreement with our *in vitro* findings (Fig 1),  
157 exogenous PGE<sub>2</sub> increased the growth of both the parental H99 strain (Fig 2B, p = 0.0137,  
158 1.35-fold increase vs. DMSO) and the  $\Delta plb1$ -GFP mutant (Fig 2E, p= 0.0001, 2.15-fold increase  
159 vs. DMSO) while PGD<sub>2</sub> did not (Fig 2C and 2F). Taken together these data show that PGE<sub>2</sub> is  
160 sufficient to enhance the virulence of *C. neoformans in vivo*, furthermore our *in vitro* data  
161 suggest that this is a result of uncontrolled intracellular proliferation within macrophages (Fig 1).

162  
163 *Prostaglandin E<sub>2</sub> must be dehydrogenated into 15-keto-PGE<sub>2</sub> to promote C. neoformans growth.*

164  
165 PGE<sub>2</sub> can be enzymatically and non-enzymatically modified in cells to form a number of distinct  
166 metabolites. To distinguish the biological activity of PGE<sub>2</sub> rather than its metabolites we used an  
167 analogue of PGE<sub>2</sub> called 16,16-dimethyl PGE<sub>2</sub> that cannot be dehydrogenated but otherwise has  
168 comparable activity to PGE<sub>2</sub> (25)). We found that unlike PGE<sub>2</sub>, 16,16-dimethyl PGE<sub>2</sub> treatment  
169 did not increase the fungal burden of  $\Delta plb1$ -GFP (Fig 3C p= 0.9782) or H99-GFP infected  
170 larvae (Fig 3A p= 0.9954). Therefore, the biological activity of PGE<sub>2</sub> alone did not appear to  
171 promote cryptococcal pathogenesis and that dehydrogenation of PGE<sub>2</sub> was required. PGE<sub>2</sub> and  
172 16,16-dimethyl PGE<sub>2</sub> both signal through PGE<sub>2</sub> receptors (EP1, EP2, EP3 and EP4) but 15-keto-  
173 PGE<sub>2</sub> does not. In a murine model of pulmonary cryptococcosis the PGE<sub>2</sub> receptors EP2 and  
174 EP4 have been identified as promoters of fungal virulence (20). To confirm that PGE<sub>2</sub> itself does  
175 not promote virulence in our model we treated zebrafish with antagonists against the EP2 and  
176 EP4 receptors. In support of our previous experiment we found that EP2 / EP4 inhibition had no  
177 effect on fungal burden in zebrafish (Fig 3E). An abundant dehydrogenated form of PGE<sub>2</sub> is 15-  
178 keto-PGE<sub>2</sub> (that has also been isolated from *C. neoformans* (18)) and we tested if 15-keto-PGE<sub>2</sub>



179 was sufficient to rescue the growth defect of the  $\Delta plb1$  mutant during infection. Therefore, we  
180 treated infected zebrafish larvae with exogenous 15-keto-PGE<sub>2</sub> and found that this was  
181 sufficient to significantly increase the fungal burden of zebrafish larvae infected with both  $\Delta plb1$ -  
182 GFP (Fig 3D,  $p = 0.0119$ , 1.56-fold increase vs. DMSO) and H99-GFP (Fig 3B,  $p = 0.0048$ ,  
183 1.36-fold increase vs. DMSO). To explore the *Cryptococcus* eicosanoid synthesis pathway  
184 further we used a second eicosanoid deficient *C. neoformans* mutant  $\Delta lac1$ . Whereas  $\Delta plb1$  is  
185 unable to produce any eicosanoid species  $\Delta lac1$  is deficient only in PGE<sub>2</sub> and 15-keto-PGE<sub>2</sub>  
186 (18). Using a  $\Delta lac1$ -GFP strain generated for this study we found that  $\Delta lac1$ -GFP also produced  
187 low fungal burden during *in vivo* zebrafish larvae infection (Supplementary Fig 2B). As with  
188  $\Delta plb1$ -GFP, this defect could be rescued with the addition of exogenous PGE<sub>2</sub> (Supplementary  
189 Fig 2C), but not with 16,16-dm-PGE<sub>2</sub> (Supplementary Fig 2D) or with 15-keto-PGE<sub>2</sub>  
190 (Supplementary Fig 2E). Prostaglandin E<sub>2</sub> is known to affect haematopoietic stem cell  
191 homeostasis in zebrafish (26). This could affect macrophage number and subsequently fungal  
192 burden. We have previously observed that a large depletion of macrophages can lead to  
193 increased fungal burden in zebrafish larvae (22). We performed whole body macrophage counts  
194 on 2 dpf uninfected larvae treated with PGE<sub>2</sub> or 15-keto-PGE<sub>2</sub> 2 days post treatment (the same  
195 time points used in our infection assay). Following PGE<sub>2</sub> and 15-keto PGE<sub>2</sub> treatment  
196 macrophages were still observable throughout the larvae. For PGE<sub>2</sub> treatment we saw on  
197 average a 15% reduction in macrophage number while 15-keto PGE<sub>2</sub> did not cause any  
198 decrease (Supplementary Fig 1C). Due to the fact that fungal burden increased during both  
199 PGE<sub>2</sub> and 15-keto PGE<sub>2</sub> treatments it is highly unlikely that this reduction could account for the  
200 increases in burden seen.

201

202 *Host derived prostaglandins are not required for growth of C. neoformans*

203

204 After determining that PGE<sub>2</sub> promotes the growth of *C. neoformans* *in vitro* and *in vivo* via its  
205 metabolite 15-keto-PGE<sub>2</sub>, we wanted to determine whether the source of these prostaglandins  
206 was the host or the fungus. Our *in vitro* data show that the *C. neoformans* strain  $\Delta plb1$  has a  
207 growth deficiency *in vitro* and *in vivo* that can be rescued with the addition of PGE<sub>2</sub>, because  
208 this phenotype is mediated by cryptococcal phospholipase B1 it indicates that pathogen-derived  
209 rather than host-derived prostaglandins are required. A previous study reports that *C.*  
210 *neoformans* infection can induce higher PGE<sub>2</sub> levels in the lung during *in vivo* pulmonary  
211 infection of mice (20), although it was not determined if the PGE<sub>2</sub> was host or pathogen derived.  
212 Therefore, we tested the hypothesis that host prostaglandin synthesis was not required for  
213 cryptococcal virulence.

214

215 To block host prostaglandin synthesis *in vitro* we inhibited host cyclooxygenase activity because  
216 it is essential for prostaglandin synthesis in vertebrates (27). We treated H99 and  $\Delta plb1$  infected  
217 J774 macrophages with aspirin at a concentration we determined was sufficient to block host  
218 PGE<sub>2</sub> synthesis (Supplementary Fig 3A). Aspirin is a non-reversible inhibitor of cyclooxygenase  
219 1 (COX-1) and cyclooxygenase 2 (COX-2) enzymes, we therefore included a condition where  
220 J774 cells were pretreated with aspirin only prior to infection and then at a condition where  
221 aspirin was present throughout infection. We found that aspirin treatment did not affect the  
222 intracellular proliferation of H99 or  $\Delta plb1$  (Fig 4A), suggesting that host cyclooxygenase activity  
223 is not required for the phospholipase B1 dependent virulence of *C. neoformans* during  
224 macrophage infection. To confirm these *in vivo*, we pharmacologically blocked zebrafish  
225 cyclooxygenase-1 (COX-1) and cyclooxygenase-2 (COX-2). We used separate cyclooxygenase  
226 inhibitors with zebrafish larvae instead of aspirin because we found that aspirin treatment led to  
227 lethal developmental defects in zebrafish larvae (unpublished observation). We infected 2 dpf  
228 zebrafish larvae with H99-GFP and  $\Delta plb1$ -GFP and treated with inhibitors for COX-1 (NS-398,  
229 15  $\mu$ M) and COX-2 (SC-560, 15  $\mu$ M). We found that both inhibitors decreased the fungal burden

230 of H99-GFP, but not  $\Delta plb1$ -GFP infected zebrafish larvae (Fig 4B i and 4B ii, H99-GFP - NS-  
231 398,  $p= 0.0002$ , 1.85-fold decrease vs. DMSO. SC-560  $p= <0.0001$ , 3.14-fold decrease vs  
232 DMSO). These findings were different to what we had observed *in vitro* but because this  
233 phenotype was phospholipase B1 dependent we reasoned that these inhibitors could be having  
234 off target effects on *C. neoformans* - although *C. neoformans* does not have a homolog to  
235 cyclooxygenase other studies have tried to inhibit eicosanoid production in *Cryptococcus* using  
236 cyclooxygenase inhibitors but their efficacy and target remain uncertain (17,28). To support our  
237 pharmacological evidence, we used a CRISPR/Cas9-mediated knockdown of the prostaglandin  
238  $E_2$  synthase gene (*ptges*) (29). We used a knockdown of tyrosinase (*tyr*) – a gene involved in  
239 the conversion of tyrosine into melanin as a control because *tyr*<sup>-/-</sup> crispants are easy to identify  
240 because they do not produce any pigment. We infected 2 dpf *ptges*<sup>-/-</sup> and *tyr*<sup>-/-</sup> zebrafish larvae  
241 with H99-GFP or  $\Delta plb1$ -GFP and measured the fungal burden at 3 dpi. We found that *ptges*<sup>-/-</sup>  
242 zebrafish infected with H99-GFP had a higher fungal burden at 3 dpi compared to *tyr*<sup>-/-</sup> zebrafish  
243 infected with H99-GFP whereas there was no difference between *ptges*<sup>-/-</sup> and *tyr*<sup>-/-</sup> zebrafish  
244 larvae infected with  $\Delta plb1$ -GFP (Fig 4C). Thus, both pharmacological and genetic inhibitions of  
245 host prostaglandin synthesis were not determinants of *C. neoformans* growth.

246

#### 247 *Phospholipase B1 dependent factors are sufficient to support $\Delta plb1$ growth in macrophages*

248 To further evidence that *C. neoformans* was the source of PGE<sub>2</sub> during macrophage infection  
249 we used a co-infection assay which has previously been used to investigate the interaction of  
250 different *C. gattii* strains within the same macrophage (30). We hypothesised that if *C.*  
251 *neoformans* derived prostaglandins promoted fungal growth, co-infection between H99 and  
252  $\Delta plb1$  would support mutant growth within macrophages because the parental strain H99 would  
253 produce growth promoting prostaglandins that are lacking in  $\Delta plb1$ . To produce co-infection,  
254 J774 murine macrophages were infected with a 50:50 mixture of  $\Delta plb1$  and H99-GFP (31) (Fig

255 4E i; as described previously for *C. gattii* (30)). This approach allowed us to differentiate  
256 between  $\Delta plb1$  (GFP negative) and H99 (GFP positive) *Cryptococcus* strains within the same  
257 macrophage and to score their proliferation separately. The intracellular proliferation of  $\Delta plb1$   
258 was calculated by counting the change in number of GFP negative  $\Delta plb1$  cells over an 18hr  
259 period from time-lapse movies of infected cells. We found that co-infected macrophages did not  
260 always contain an equal ratio of each strain at the start of the 18hr period so we scored the  
261 proliferation of  $\Delta plb1$  for a range of initial burdens (1:2, 1:3 and 1:4). We found that  $\Delta plb1$   
262 proliferated better when accompanied by two H99-GFP yeast cells in the same macrophage  
263 (Fig 4E ii, 1:2  $p = 0.014$ ) as opposed to when two  $\Delta plb1$  yeast cells were accompanied by one  
264 H99-GFP yeast cell (Fig 4E ii, 2:1). We observed a similar effect for ratios of 1:3 and 1:4, but  
265 these starting burden ratios are particularly rare, under powering our analysis (Supplementary  
266 Fig 3). This effect was also recapitulated for J774 macrophages co-infected with  $\Delta lac1$  and H99-  
267 GFP (Supplementary Fig 2A). These data indicate that a phospholipase B1 dependent factor  
268 found in H99 infected macrophages, but absent in  $\Delta plb1$  and  $\Delta lac1$  infected macrophages, is  
269 required for intracellular proliferation within macrophages.

270

271 *Production of PGE<sub>2</sub> by macrophages is not altered by C. neoformans infection.*

272

273 Our data indicate that host cells are not the source of virulence promoting prostaglandins, and  
274 that secreted factors produced by wild type - but not  $\Delta plb1$  or  $\Delta lac1$  *Cryptococcus* strains –  
275 promote fungal growth within macrophages. We wanted to test if there were detectable  
276 difference in PGE<sub>2</sub> levels between infected and uninfected macrophages caused by  
277 cryptococcal prostaglandin synthesis. To do this we performed ELISA analysis to detect PGE<sub>2</sub>  
278 concentrations in supernatants from *C. neoformans* infected J774 macrophages (Fig 4D i). We  
279 found that J774 macrophages produced detectable levels of PGE<sub>2</sub> (mean concentration 4.10  
280 ng/1x10<sup>6</sup> cells), however we did not see any significant difference between infected or

281 uninfected macrophages (infected with H99,  $\Delta plb1$  or  $\Delta plb1:PLB1$  strains). To confirm our  
282 ELISA results, we performed LC MS/MS analysis of lysed J774 macrophages using a PGE<sub>2</sub>  
283 standard for accurate quantification (Fig 4D ii). The concentrations detected were similar to  
284 those measured by our ELISA (mean concentration 6.35 ng/1X10<sup>6</sup> cells) and also did not show  
285 any significant differences between conditions. Taken together these data suggest that any  
286 *Cryptococcus*-derived prostaglandins present during infection were likely to be contained within  
287 the macrophage in low, localized concentrations and that the host receptor targeted by these  
288 eicosanoids is therefore likely to be intracellular.

289

290 *15-keto-PGE<sub>2</sub> promotes C. neoformans growth by activating host PPAR- $\gamma$*

291

292 We next wanted to determine how PGE<sub>2</sub> / 15-keto-PGE<sub>2</sub> promotes *C. neoformans* infection. We  
293 hypothesized that these prostaglandins were interfering with inhibition of fungal growth via a  
294 host receptor. Our experiments inhibiting EP2 / EP4 suggest that 15-keto-PGE<sub>2</sub> must signal  
295 through a different receptor to PGE<sub>2</sub> (Fig 3E). 15-keto-PGE<sub>2</sub> is a known agonist of the  
296 peroxisome proliferation associated receptor gamma (PPAR- $\gamma$ ) (32); a transcription factor that  
297 controls expression of many inflammation related genes (33-35). We first tested if PPAR- $\gamma$   
298 activation occurs within macrophages during *C. neoformans* infection by performing  
299 immunofluorescent staining for PPAR- $\gamma$  in macrophages infected with H99 and  $\Delta plb1$ . To  
300 quantify PPAR- $\gamma$  activation we measured its nuclear translocation by comparing nuclear and  
301 cytoplasmic fluorescence intensity in infected cells. PPAR- $\gamma$  is a cytosolic receptor that  
302 translocates to the nucleus upon activation, therefore cells where PPAR- $\gamma$  is activated should  
303 have increased nuclear staining for PPAR- $\gamma$ . We found that J774 macrophages infected with  
304 H99 had significantly higher levels of nuclear staining for PPAR- $\gamma$  compared to  $\Delta plb1$  infected

305 and uninfected cells (Fig 5A i and Supplementary Fig 3C). This confirmed that *C. neoformans*  
306 activates PPAR- $\gamma$  and that this phenotype is phospholipase B1 dependent.

307

308 To test the activation of PPAR- $\gamma$  during infection we first wanted to confirm that exogenous 15-  
309 keto-PGE<sub>2</sub> activates zebrafish PPAR- $\gamma$  *in vivo* by using transgenic PPAR- $\gamma$  reporter zebrafish  
310 larvae (36,37). We treated these larvae at 2 dpf with 15-keto-PGE<sub>2</sub> and Troglitazone (TLT) which  
311 is a specific agonist of PPAR- $\gamma$ . TLT treatment was performed with a concentration (0.55  $\mu$ M)  
312 previously shown to strongly activate PPAR- $\gamma$  in these zebrafish larvae (36). We found that TLT  
313 treatment at 2 dpf strongly activated GFP reporter expression in the larvae. We employed a  
314 receptor competition assay as a sensitive measurement of binding by simultaneously treating  
315 zebrafish with with 15-keto-PGE<sub>2</sub> and TLT. We observed a reduction in GFP expression  
316 compared to TLT treatment alone (Fig 5 Aii), demonstrating competition for the same receptor.  
317 This could mean that 15-keto-PGE<sub>2</sub> was a partial agonist (38,39) or an antagonist to PPAR- $\gamma$  in  
318 this experiment. Existing studies suggest 15-keto-PGE<sub>2</sub> is an agonist to PPAR- $\gamma$  (32) but to  
319 confirm this in our model we treated  $\Delta plb1$ -GFP infected zebrafish larvae with exogenous 15-  
320 keto-PGE<sub>2</sub> as before but at the same time treated fish with the PPAR- $\gamma$  antagonist GW9662. We  
321 found that 15-keto-PGE<sub>2</sub> treatment significantly improved the growth of  $\Delta plb1$ -GFP during  
322 infection but that inhibition of PPAR- $\gamma$  was sufficient to reverse this effect (Fig 5C). Therefore,  
323 we could demonstrate that that 15-keto-PGE<sub>2</sub> was an agonist to PPAR- $\gamma$ , and that PPAR- $\gamma$   
324 activation was sufficient to promote a permissive environment for *C. neoformans* growth during  
325 infection.

326

327 To determine if PPAR- $\gamma$  activation by *C. neoformans* facilitates growth within macrophages we  
328 treated H99 and  $\Delta plb1$  infected J774 murine macrophages with the PPAR- $\gamma$  antagonist  
329 GW9662. GW9662 treatment significantly reduced the proliferation of H99, but not  $\Delta plb1$  (Fig

330 5B,  $p=0.026$ , 1.22-fold decrease vs. DMSO). Further supporting that PPAR- $\gamma$  activation is  
331 necessary for the successful intracellular parasitism of host macrophages by *C. neoformans*.  
332 Finally, to confirm that PPAR- $\gamma$  activation alone promoted *C. neoformans* infection we treated  
333 2dpf infected zebrafish larvae with TLT at the same concentration known to activate PPAR- $\gamma$  in  
334 PPAR- $\gamma$  reporter fish (Fig 5A ii and (36)). We found that TLT treatment significantly increased  
335 the fungal burden of  $\Delta plb1$ -GFP (Fig 5E and,  $p = 0.0089$ , 1.68-fold increase vs. DMSO), H99-  
336 GFP (Fig 5D ,  $p = 0.0044$ , 1.46-fold increase vs. DMSO) and  $\Delta lac1$ -GFP (Fig 5F,  $p = 0.01$ , 1.94-  
337 fold increase vs. DMSO) infected larvae similar to 15-keto-PGE<sub>2</sub> treatment. Thus, we could  
338 show that host PPAR- $\gamma$  activation was sufficient to promote cryptococcal growth during infection  
339 and was a consequence of fungal derived prostaglandins.

340

341

342

343 **Discussion**

344 We have shown for the first time that eicosanoids produced by *C. neoformans* promote fungal  
345 virulence both *in vitro* and *in vivo*. In this respect we have shown that the intracellular growth  
346 defects of two eicosanoid deficient *C. neoformans* strains  $\Delta plb1$  and  $\Delta lac1$  (21,23) can be  
347 rescued with the addition of exogenous PGE<sub>2</sub>. Furthermore, our *in vitro* co-infection assay, *in*  
348 *vitro* infection assays with aspirin, and *in vivo* infection assays provide evidence that the source  
349 of this eicosanoid during infection is from the pathogen, rather than the host. Using an *in vivo*  
350 zebrafish larvae model of cryptococcosis we find that that PGE<sub>2</sub> must be dehydrogenated into  
351 15-keto-PGE<sub>2</sub> before to influence fungal growth. Finally, we provide evidence that the  
352 mechanism of PGE<sub>2</sub>/15-keto-PGE<sub>2</sub> mediated growth promotion during larval infection is via the  
353 activation of PPAR- $\gamma$  (33,34,40-42).

354

355 In a previous study it was identified that the *C. neoformans* mutant  $\Delta plb1$  (that lacks the *PLB1*  
356 gene coding for phospholipase B1) was deficient in replication and survival in macrophages  
357 (21), a phenotype also observed by a number of studies using different *in vitro* infection assays  
358 (19,23). In this study we demonstrate that supplementing  $\Delta plb1$  with exogenous prostaglandin  
359 E<sub>2</sub> during *in vitro* macrophages infection is sufficient to restore the mutant's intracellular  
360 proliferation defect. A key goal of this study was to investigate how eicosanoids produced by *C.*  
361 *neoformans* modulate pathogenesis *in vivo* (22). To facilitate *in vivo* measurement of fungal  
362 burden we created two GFP-tagged strains with constitutive GFP expression -  $\Delta plb1$ -GFP and  
363  $\Delta lac1$ -GFP - to use alongside the GFP-tagged H99 parental strain previously produced (31).  
364 These two mutants are the only *C. neoformans* mutants known to have a deficiency in  
365 eicosanoid synthesis.  $\Delta plb1$  cannot produce any eicosanoid species suggesting phospholipase  
366 B1 is high in the eicosanoid synthesis pathway while  $\Delta lac1$  has a specific defect in PGE<sub>2</sub>  
367 suggesting it might be a prostaglandin E<sub>2</sub> synthase enzyme. To our knowledge these are the  
368 first GFP tagged versions of  $\Delta plb1$  and  $\Delta lac1$  created. Characterisation of  $\Delta plb1$ -GFP and



369  $\Delta lac1$ -GFP *in vivo* revealed that both strains have significantly reduced fungal burdens  
370 compared to H99-GFP. This is the first report of  $\Delta lac1$  in zebrafish but these observations do  
371 confirm a previous zebrafish study showing that non-fluorescent  $\Delta plb1$  had attenuated infectious  
372 burden in zebrafish larvae (43). To confirm that PGE<sub>2</sub> is also required for cryptococcal growth *in*  
373 *vivo* we treated  $\Delta plb1$ -GFP and  $\Delta lac1$ -GFP infected zebrafish larvae with exogenous PGE<sub>2</sub> to  
374 determine how it would affect fungal burden. In agreement with our *in vitro* findings we found  
375 that PGE<sub>2</sub> significantly improved the growth of both of these strains within larvae. Interestingly  
376 we also found that PGE<sub>2</sub> improved the growth of H99-GFP, perhaps representing a wider  
377 manipulation of host immunity during *in vivo* infection.

378 In vertebrate cells, PGE<sub>2</sub> is converted into 15-keto-PGE<sub>2</sub> by the enzyme 15-prostaglandin  
379 dehydrogenase (15PGDH), furthermore it has been reported that *C. neoformans* has enzymatic  
380 activity analogous to 15PGDH (18). To investigate how the dehydrogenation of PGE<sub>2</sub> to 15-  
381 keto-PGE<sub>2</sub> influenced fungal burden we treated infected larvae with 16,16-dm-PGE<sub>2</sub> – a  
382 synthetic variant of PGE<sub>2</sub> which is resistant to dehydrogenation (25). Interestingly we found that  
383 16,16-dm-PGE<sub>2</sub> was unable to promote the growth of  $\Delta plb1$ -GFP, H99-GFP or  $\Delta lac1$ -GFP within  
384 infected larvae. These findings indicate that 15-keto-PGE<sub>2</sub>, rather than PGE<sub>2</sub>, promotes  
385 cryptococcal virulence. We subsequently treated infected larvae with exogenous 15-keto-PGE<sub>2</sub>  
386 and confirmed that 15-keto-PGE<sub>2</sub> treatment was sufficient to promote the growth of both  $\Delta plb1$ -  
387 GFP and H99-GFP, but not  $\Delta lac1$ -GFP (discussed below), without the need for PGE<sub>2</sub>. We  
388 therefore propose that PGE<sub>2</sub> produced by *C. neoformans* during infection must be enzymatically  
389 dehydrogenated into 15-keto-PGE<sub>2</sub> to promote cryptococcal virulence. These findings represent  
390 the identification of a new virulence factor (15-keto-PGE<sub>2</sub>) produced by *C. neoformans*, as well  
391 as the first-time identification of an eicosanoid other than PGE<sub>2</sub> with a role in promoting  
392 cryptococcal growth. Furthermore, our findings suggest that previous studies which identify

393 PGE<sub>2</sub> as a promoter of cryptococcal virulence (19,20,44) may have observed additive effects  
394 from both PGE<sub>2</sub> and 15-keto-PGE<sub>2</sub> activity.

395 Our experiments with the  $\Delta lac1$ -GFP strain reveals that this strain appears to respond in a  
396 similar way to PGE<sub>2</sub>, 16,16-dm-PGE<sub>2</sub> and troglitazone as  $\Delta plb1$ -GFP but appears to be  
397 unresponsive to 15-keto-PGE<sub>2</sub>. At this time, we cannot fully explain this phenotype,  $\Delta lac1$ -GFP  
398 was generally less responsive to PGE<sub>2</sub> and troglitazone treatments compared to  $\Delta plb1$ -GFP so  
399 it is possible that that higher concentrations of 15-keto-PGE<sub>2</sub> would be needed to rescue its  
400 growth defect, however experimentation with higher concentrations of 15-keto-PGE<sub>2</sub> led to  
401 significant host toxicity. The unresponsiveness of  $\Delta lac1$  to eicosanoid treatment could be due to  
402 unrelated virulence defects caused by laccase deficiency. Cryptococcal laccase expression is  
403 required for the production of fungal melanin – a well characterized virulence factor produced by  
404 *C. neoformans* (45,46). It is therefore likely that virulence defects unrelated to eicosanoid  
405 synthesis are responsible for the differences between the two mutant phenotypes.

406 We have found that the phospholipase B1 dependent attenuation of  $\Delta plb1$  can be rescued with  
407 the addition of exogenous PGE<sub>2</sub>. This indicates that synthesis and secretion of PGE<sub>2</sub> by *C.*  
408 *neoformans* is a virulence factor. Although our data indicated that *C. neoformans* was the  
409 source of PGE<sub>2</sub> we wanted exclude the possibility that host-derived PGE<sub>2</sub> was also contributing  
410 to virulence. To explore this possibility, we blocked host prostaglandin synthesis - we reasoned  
411 that if host PGE<sub>2</sub> was not required that blocking its production would not affect the growth of *C.*  
412 *neoformans*. To do this we first treated J774 macrophages infected with H99-GFP and  $\Delta plb1$ -  
413 GFP with aspirin – a cyclooxygenase inhibitor that blocks both COX-1 and COX-2 activity – and  
414 found that this had no effect on intracellular proliferation. Subsequently we attempted to block  
415 cyclooxygenase activity in zebrafish but found aspirin was lethal at the zebrafish larvae's  
416 currently stage of development, instead we used individual inhibitors specific for COX-1 (NS-  
417 398) and COX-2 (SC-560). We found that each inhibitor decreases fungal burden of H99-GFP

418 infected larvae but not  $\Delta plb1$ -GFP infected larvae. Due to the phospholipase B1 dependence of  
419 this phenotype we think that these inhibitors might be affecting eicosanoid production by the *C.*  
420 *neoformans* itself. The ability of broad COX inhibitors like aspirin/indomethacin to inhibit  
421 eicosanoid production by *C. neoformans* is controversial (17,28) however our study is the first to  
422 use such selective COX-1 and COX-2 inhibitors on *C. neoformans*. This experiment remained  
423 inconclusive as to whether host PGE<sub>2</sub> synthesis promotes virulence so to block PGE<sub>2</sub> in  
424 zebrafish larvae without potential off target effects we used CRISPR Cas9 technology to  
425 knockdown expression of the prostaglandin E<sub>2</sub> synthase gene *ptges* in zebrafish larvae.  
426 Ablating zebrafish *ptges* with this approach did not affect the fungal burden of  $\Delta plb1$ -GFP  
427 infected larvae but it did cause increased burden in H99-GFP infected zebrafish. This  
428 phenotype is interesting because it suggests host PGE<sub>2</sub> might actually be inhibitory to  
429 cryptococcal virulence, furthermore this phenotype was phospholipase B1 dependent which  
430 suggests host-derived PGE<sub>2</sub> might interact in some way with *Cryptococcus*-derived eicosanoids.  
431 This phenotype was not seen *in vitro* with aspirin so it is possible that the inhibitory effects of  
432 host-derived PGE<sub>2</sub> influence a non-macrophage cell type in zebrafish larvae.

433 To confirm our observations that *C. neoformans* was the source of PGE<sub>2</sub> during infection we  
434 performed co-infection assays with H99 wild type cryptococci (eicosanoid producing) and  $\Delta plb1$   
435 (eicosanoid deficient) within the same macrophage and found that co-infection was sufficient to  
436 promote the intracellular growth of  $\Delta plb1$ . We also observed similar interactions during  $\Delta lac1$   
437 co-infection (a second eicosanoid deficient *C. neoformans* mutant). These observations agree  
438 with previous studies that suggest eicosanoids are virulence factors produced by *C. neoformans*  
439 during macrophage infection (19,28). To identify if the secreted factor produced by *C.*  
440 *neoformans* was PGE<sub>2</sub>, we measured the levels of PGE<sub>2</sub> from *Cryptococcus* infected  
441 macrophages to see if there was an observable increase in this eicosanoid during infection.  
442 Although PGE<sub>2</sub> was detected, we did not see any significant difference between infected and

443 uninfected macrophages, an observation confirmed using two different detection techniques –  
444 ELISA and LC MS/MS. These data suggest that PGE<sub>2</sub> produced by *C. neoformans* during  
445 macrophage infection is contained within the macrophage, likely in close proximity to the fungus  
446 and that the host receptor targeted by these eicosanoids is therefore likely to be intracellular.  
447 Our *in vitro* co-infection experiments indicate that *C. neoformans* secretes virulence enhancing  
448 eicosanoids during infection.

449 The biological activity of 15-keto-PGE<sub>2</sub> is far less studied than PGE<sub>2</sub>. It is known that 15-keto-  
450 PGE<sub>2</sub> cannot bind to prostaglandin E<sub>2</sub> EP receptors, this means it can act as a negative  
451 regulator of PGE<sub>2</sub> activity i.e. cells up-regulate 15PGDH activity to lower PGE<sub>2</sub> levels (47). Our  
452 findings however suggested that 15-keto-PGE<sub>2</sub> did have a biological activity independent of  
453 PGE<sub>2</sub> synthesis, possibly via a distinct eicosanoid receptor. It has been demonstrated that 15-  
454 keto-PGE<sub>2</sub> can activate the intracellular eicosanoid receptor peroxisome proliferator associated  
455 receptor gamma (PPAR- $\gamma$ ) (32). Activation of PPAR- $\gamma$  by *C. neoformans* has not been  
456 described previously but it is compatible with what we know of cryptococcal pathogenesis.  
457 PPAR- $\gamma$  is a nuclear receptor normally found within the cytosol. Upon ligand binding PPAR- $\gamma$   
458 forms a heterodimer with Retinoid X receptor (RXR) and translocates to the nucleus where it  
459 influences the expression of target genes which possess a peroxisome proliferation hormone  
460 response element (PPRE) (48). If eicosanoids are produced by *C. neoformans* during  
461 intracellular infection, it is likely that they bind to an intracellular eicosanoid receptor.  
462 Additionally, activation of PPAR- $\gamma$  within macrophages is known to promote the expression of  
463 anti-inflammatory genes which could make the macrophage more amenable to parasitism by  
464 the fungus.

465 To investigate whether PPAR- $\gamma$  activation within macrophages occurs during *C. neoformans*  
466 infection we performed immunofluorescent staining of H99 and  $\Delta plb1$  infected J774  
467 macrophages. We found that infection with *C. neoformans* led to increased nuclear localization

468 of PPAR- $\gamma$  indicating that the fungus was activating endogenous PPAR- $\gamma$  during infection. We  
469 also found that macrophages infected with H99 had higher levels of PPAR- $\gamma$  activation than  
470  $\Delta plb1$  infected macrophages. This strongly suggests that eicosanoids produced by *C.*  
471 *neoformans* are responsible for activating PPAR- $\gamma$ .

472 To confirm that 15-keto-PGE<sub>2</sub> is an agonist to PPAR- $\gamma$  we performed experiments with zebrafish  
473 larvae from PPAR- $\gamma$  GFP reporter fish (36) and demonstrated that 15-keto-PGE<sub>2</sub> binds to  
474 zebrafish PPAR- $\gamma$ . To determine if 15-keto-PGE<sub>2</sub> is an agonist to PPAR- $\gamma$  we found that  
475 treating  $\Delta plb1$ -GFP infected zebrafish larvae with GW9662 at the same time as 15-keto-PGE<sub>2</sub>  
476 blocked the virulence enhancing effects of the eicosanoid. These data indicate that 15-keto-  
477 PGE<sub>2</sub> is a partial agonist to PPAR- $\gamma$  (in zebrafish at least). Partial agonists are weak agonists  
478 that bind to and activate receptors, but not at the same efficacy as a full agonist. Partial agonists  
479 to PPAR- $\gamma$  have been reported previously, partial PPAR agonists bind to the ligand binding  
480 domain of PPAR- $\gamma$  with a lower affinity than full PPAR agonists and as a result activate smaller  
481 subsets of PPAR- $\gamma$  controlled genes (38,39,49-52).

482 We also found that activation of PPAR- $\gamma$  alone was sufficient to mediate cryptococcal virulence.  
483 In this respect, we found that the *in vitro* intracellular proliferation of the wild type H99  
484 cryptococcal strain within J774 macrophages could be suppressed using a PPAR- $\gamma$  antagonist  
485 GW9662. We could also block the rescuing effect of 15-keto-PGE<sub>2</sub> on  $\Delta plb1$ -GFP during  
486 zebrafish infection using GW9662. Finally we found that *Cryptococcus* infected zebrafish treated  
487 with troglitazone at a concentration that is known to activate PPAR- $\gamma$  (53) had increased fungal  
488 burdens when infected with  $\Delta plb1$ -GFP,  $\Delta lac1$ -GFP and H99-GFP strains. Taken together these  
489 experiments provide convincing evidence that a novel cryptococcal virulence factor - 15-keto-  
490 PGE<sub>2</sub> – enhances the virulence of *C. neoformans* by activation of host PPAR- $\gamma$  and that  
491 macrophages are one of the key targets of this eicosanoid during infection.

492 In this study, we have shown for the first time that eicosanoids produced by *C. neoformans* can  
493 promote virulence in an *in vivo* host. Furthermore, we have provided evidence that this virulence  
494 occurs via eicosanoid mediated manipulation of host macrophages. We have identified that the  
495 eicosanoid responsible for these effects is 15-keto-PGE<sub>2</sub> which is derived from the  
496 dehydrogenation of PGE<sub>2</sub> produced by *C. neoformans*. We have subsequently demonstrated  
497 that 15-keto-PGE<sub>2</sub> mediates its effects via activation of PPAR-  $\gamma$ , an intracellular eicosanoid  
498 receptor known to promote anti-inflammatory immune pathways within macrophages. We  
499 provide compelling evidence that eicosanoids produced by *C. neoformans* enhance virulence,  
500 identifies a novel virulence factor – 15-keto-PGE<sub>2</sub> – and describes a novel mechanism of host  
501 manipulation by *C. neoformans* - activation of PPAR-  $\gamma$ . Most importantly this study provides a  
502 potential new therapeutic pathway for treatment of cryptococcal infection, as several eicosanoid  
503 modulating drugs are approved for patient treatment (54) .

504

## 505 **Materials and methods**

506 (all reagents are from Sigma-Aldrich, UK unless otherwise stated)

## 507 **Ethics statement**

508 Animal work was performed following UK law: Animal (Scientific Procedures) Act 1986, under  
509 Project License PPL 40/3574 and P1A4A7A5E. Ethical approval was granted by the University  
510 of Sheffield Local Ethical Review Panel. Experiments using the PPAR- $\gamma$  reporter fish line (53)  
511 were conducted at the University of Toronto following approved animal protocols (# 00000698  
512 “A live zebrafish-based screening system for human nuclear receptor ligand and cofactor  
513 discovery”) under a OMAFRA certificate.

## 514 **Zebrafish**

515 The following zebrafish strains were used for this study: *Nacre* wild type strain,  
516 *Tg(mpeg1:mCherryCAAX)sh378*) transgenic strain and the double mutant *casper*, for PPAR $\gamma$   
517 reporter experiments (53), which lacks all melanophores and iridophores (55). Zebrafish were  
518 maintained according to standard protocols. Adult fish were maintained on a 14:10 – hour light /  
519 dark cycle at 28 °C in UK Home Office approved facilities in the Bateson Centre aquaria at the  
520 University of Sheffield.

### 521 ***C. neoformans***

522 The H99-GFP strain has been previously described (31). The  $\Delta plb1$ -GFP and  $\Delta lac1$ -GFP  
523 stains was generated for this study by transforming existing deletion mutant strains (23,56) with  
524 a GFP expression construct (see below for transformation protocol). All strains used are in the  
525 *C. neoformans* variety *grubii* H99 genetic background.

526 *Cryptococcus* strains were grown for 18 hours at 28 °C, rotating horizontally at 20 rpm.  
527 *Cryptococcus* cultures were pelleted at 3300g for 1 minute, washed twice with PBS (Oxoidm  
528 Basingstoke, UK) and re-suspended in 1ml PBS. Washed cells were then counted with a  
529 haemocytometer and used as described below.

### 530 ***C. neoformans* transformation**

531 *C. neoformans* strains  $\Delta plb1$  and  $\Delta lac1$  were biolistically transformed using the pAG32\_GFP  
532 transformation construct as previously described for H99-GFP (31). Stable transformants were  
533 identified by passaging positive GFP fluorescent colonies for at least 3 passages on YPD agar  
534 supplemented with 250  $\mu$ g/ml Hygromycin B.

### 535 **Zebrafish CRISPR**

536 CRISPR generation was performed as previously described (29). Briefly gRNA spanning the  
537 ATG start codon of zebrafish *ptges* or *tyr* was injected along with Cas9 protein and tracrRNA

538 into zebrafish embryos at the single cell stage. Crispant larvae were infected with *C.*  
539 *neoformans* as described above at 2 dpf. The genotype of each larvae was confirmed post  
540 assay – genomic DNA was extracted from each larvae and the ATG was PCR amplified with  
541 primers spanning the ATG site of *ptges* (Forward primer gcccaagtataatgaggaatggg, Reverse  
542 primer aatgtttggattaaacgcgact) producing a 345-bp product. This product was digested with MwoI  
543 – wildtype digests produced bands at 184, 109 and 52 bp while mutant digests produced bands  
544 at 293 and 52 bp (Supplementary Figure 4).

#### 545 **J774 Macrophage infection – with exogenous PGE<sub>2</sub> treatment**

546 J774 macrophage (J774 cells were obtained from the ATCC, American Type Culture Collection)  
547 infection was performed as previously described (21) with the following alterations. J774 murine  
548 macrophage-like cells were cultured for a minimum of 4 passages in T75 tissue culture flasks at  
549 37°C 5% CO<sub>2</sub> in DMEM (High glucose, Sigma) supplemented with 10% Fetal Bovine Calf  
550 Serum (Invitrogen), 1% 10,000 units Penicillin / 10 mg streptomycin and 1 % 200 mM L –  
551 glutamine, fully confluent cells were used for each experiment. Macrophages were counted by  
552 haemocytometer and diluted to a concentration of 1x10<sup>5</sup> cells per ml in DMEM supplemented  
553 with 1 µg/ml lipopolysaccharide (LPS from *E. coli*, Sigma L2630) before being plated into 24 well  
554 microplates (Greiner) and incubated for 24 hours (37 °C 5% CO<sub>2</sub>).

555 Following 24-hour incubation, medium was removed and replaced with 1 ml DMEM  
556 supplemented with 2 nM prostaglandin E<sub>2</sub> (CAY14010, 1mg/ml stock in 100% ethanol).  
557 Macrophage wells were then infected with 100 µl 1x10<sup>6</sup> yeast/ml *Cryptococcus* cells (from  
558 overnight culture, washed. See above) opsonized with anti-capsular IgG monoclonal antibody  
559 (18b7, a kind gift from Arturo Casadevall). Cells were incubated for 2 hours (37 °C 5% CO<sub>2</sub>) and  
560 then washed with 37 °C PBS until extracellular yeast were removed. After washing, infected  
561 cells were treated with 1ml DMEM supplemented with PGE<sub>2</sub>.



562 To calculate IPR, replicate wells for each treatment/strain were counted at 0 and 18 hours. Each  
563 well was washed once with 1ml 37 °C PBS prior to counting to remove any *Cryptococcus* cells  
564 released by macrophage death or vomocytosis. Intra-macrophage Cryptococci were released  
565 by lysis with 200 µl dH<sub>2</sub>O for 20 minutes (lysis confirmed under microscope). Lysate was  
566 removed to a clean microcentrifuge tube and an additional 200 µl was used to wash the well to  
567 make a total lysate volume of 400 µl. *Cryptococcus* cells within lysates were counted by  
568 haemocytometer. IPR was calculated by dividing the total number of counted yeast at 18hr by  
569 the total at 0hr.

570 To assess the viability of *C. neoformans* cells recovered from macrophages we used our  
571 previously published colony forming unit (CFU) viability assay (21). Lysates from *C. neoformans*  
572 infected J774 cells were prepared from cells at 0hr and 18hr time points. The concentration of  
573 *C. neoformans* cells in the lysate was calculated by haemocytometer counting, the lysates were  
574 then diluted to give an expected concentration of  $2 \times 10^3$  yeast cells per ml. 100 µl of this diluted  
575 lysate was spread onto a YPD agar plate and incubated for 48 hr at 25°C prior to colony  
576 counting.

#### 577 **J774 Macrophage co-infection.**

578 J774 cells were prepared and seeded at a concentration of  $1 \times 10^5$  per ml as above in 24 well  
579 microplates and incubated for 24 hours (37 °C 5% CO<sub>2</sub>), 45 minutes prior to infection J774 cells  
580 were activated with 150 ng/ml phorbol 12-myristate 13-acetate in DMSO added to 1 ml serum  
581 free DMEM. Following activation J774 cells were washed and infected with 100 µl /  $1 \times 10^6$   
582 yeast/ml 50:50 mix of  $\Delta plb1$  (non-fluorescent) and H99-GFP (e.g.  $5 \times 10^5$   $\Delta plb1$  and  $5 \times 10^5$  H99-  
583 GFP) or  $\Delta lac1$ -GFP and H99 (non-fluorescent). Infected cells were incubated for 2 hours (37 °C  
584 5% CO<sub>2</sub>) to allow for phagocytosis of *Cryptococcus* and then washed multiple times with 37 °C

585 PBS to remove unphagocytosed yeast, each well was observed between washes to ensure that  
586 macrophages were not being washed away. After washing 1 ml DMEM was added to each well.  
587 Co-infected cells were imaged over 20 hours using a Nikon TE2000 microscope fitted with a  
588 climate controlled incubation chamber (37 °C 5% CO<sub>2</sub>) using a Digital Sight DS-QiMC camera  
589 and a Plan APO Ph1 20x objective lens (Nikon). GFP and bright field images were captured  
590 every 4 minutes for 20 hours. Co-infection movies were scored manually. For example co-  
591 infected macrophages that contained 2  $\Delta plb1$  (non-fluorescent) and 1 H99-GFP (GFP positive)  
592 yeast cells at 0 hr were tracked for 18 hours and before the burden of each strain within the  
593 macrophage was counted again. The IPR for  $\Delta plb1$  within co-infected macrophages was  
594 calculated by dividing the number of  $\Delta plb1$  cells within a macrophage at 18 hr by the number at  
595 0 hr.

## 596 **Immunofluorescence**

597 J774 cells were cultured to confluency as discussed above and seeded onto sterile 13 mm  
598 glass coverslips at a density of 10<sup>5</sup> cells per ml without activation by phorbol 12-myristate 13-  
599 acetate. H99-GFP and  $\Delta plb1$ -GFP were opsonised with 18B7 for one hour. 18B7 was then  
600 removed by centrifugation and fungal cells were suspended in 1 ml of PBS with 1:200 FITC for  
601 one hour. Supernatant was removed again, cells were resuspended in PBS, and J774 were  
602 infected with 10<sup>6</sup> of either H99-GFP or  $\Delta plb1$ -GFP in serum free DMEM. After two hours of  
603 infection media was removed from J774s and the J774s were washed three times with PBS. 10  
604  $\mu$ m TLT or DMSO was added to uninfected cells to act as controls. Cells were then left for 18  
605 hours at 37 °C 5 % CO<sub>2</sub>.

606 After 18 hours supernatants were removed and J774s were fixed with cold methanol for 5  
607 minutes at -20 °C before washing with PBS three times, leaving PBS for five minutes at room  
608 temperature between washes. Coverslips were blocked with 5% sheep serum in 0.1% triton

609 (block solution) for 20 minutes before being transferred into the primary PPAR- $\gamma$  antibody (1:50,  
610 Santa Cruz Biotechnology sc-7273 lot #B1417) with 1:10 human IgG in block solution for one  
611 hour. Coverslips were washed 3 times in PBS and incubated with 1:200 anti-mouse TRITC,  
612 1:40 anti-human IgG, and 0.41  $\mu$ l/ml DAPI in block solution for one hour. Coverslips were then  
613 washed three times with PBS, three times with water, and fixed to slides using MOWIOL. Slides  
614 were left in the dark overnight and imaged the following day. Imaging was performed on a Nikon  
615 Eclipse Ti microscope with a x60 DIC objective. Cells were imaged with filter sets for Cy3  
616 (PPAR- $\gamma$  , 500ms exposure) GFP (*Cryptococcus*, 35 ms exposure) and DAPI (Nuclei, 5ms)  
617 dyes in addition to DIC.

618 The intensity of nuclear staining was analysed for at least 30 cells per coverslip, using ImageJ  
619 2.0.0 a line ROI was drawn from the outside of cell, through the nucleus measuring the mean  
620 grey value along the line. For *Cryptococcus* infected conditions uninfected and infected cells  
621 were measured separately upon the same coverslip using the GFP channel to distinguish  
622 between infected and uninfected cells.

### 623 **J774 aspirin timelapse**

624 Macrophages were seeded at  $10^5$  per ml into 24 well plates as described above. After two hours  
625 cells requiring aspirin were treated with 1 mM aspirin in DMSO in fresh DMEM. Cells were then  
626 incubated overnight for 18 hours at 37 °C 5% CO<sub>2</sub>. H99-GFP and  $\Delta plb1$ -GFP were prepared at  
627  $10^6$  cells per ml as described above, and opsonised with 18B7 for one hour. J774s were then  
628 infected with the fungal cells in fresh serum free DMEM for two hours before removing the  
629 supernatant, washing three times in PBS, and adding fresh serum free DMEM. Cells were  
630 imaged for 18 hours on a Nikon Eclipse Ti equipped with a climate controlled stage  
631 (Temperature - 37 °C, Atmosphere - 5% CO<sub>2</sub>/ 95% air) with a x20 Lambda Apo NA 0.75 phase

632 contrast objective brightfield images were taken at an interval of 2 minutes, 50 ms exposure.

633 Analysis was performed by manual counts of intracellular and extracellular cryptococci.

### 634 **Zebrafish infection**

635 Washed and counted *Cryptococcus* cells from overnight culture were pelleted at 3300g for 1  
636 minute and re-suspended in 10% Polyvinylpyrrolidone (PVP), 0.5% Phenol Red in PBS to give  
637 the required inoculum in 1 nl. This injection fluid was loaded into glass capillaries shaped with a  
638 needle puller for microinjection. Zebrafish larvae were injected at 2-days post fertilisation; the  
639 embryos were anaesthetised by immersion in 0.168 mg/ml tricaine in E3 before being transferred  
640 onto microscope slides coated with 3% methyl cellulose in E3 for injection. Prepared larvae  
641 were injected with two 0.5 nl boluses of injection fluid by compressed air into the yolk sac  
642 circulation valley. Following injection, larvae were removed from the glass slide and transferred  
643 to E3 to recover from anaesthetic and then transferred to fresh E3 to remove residual methyl  
644 cellulose. Successfully infected larvae (displaying systemic infection throughout the body and no  
645 visible signs of damage resulting from injection) were sorted using a fluorescent  
646 stereomicroscope. Infected larvae were maintained at 28 °C.

### 647 **Eicosanoid / receptor agonist treatment of infected zebrafish larvae**

648 All compounds were purchased from Cayman Chemical. Compounds were resuspended in  
649 DMSO and stored at -20 °C until used. Prostaglandin E<sub>2</sub> (CAY14010, 10mg/ml stock),  
650 Prostaglandin D<sub>2</sub> (CAY12010, 10mg/ml stock), 16,16-dimethyl-PGE<sub>2</sub> (CAY14750, 10mg/ml  
651 stock), 15-keto-PGE<sub>2</sub> (CAY14720, 10mg/ml stock), troglitazone (CAY14720, 10mg/ml stock),  
652 GW9662 (CAY70785, 1mg/ml stock), AH6809 (CAY14050, 1mg/ml stock), GW627368X  
653 (CAY10009162, 10mg/ml stock), NS-398 (CAY70590, 9.4mg/ml stock), SC-560 (CAY70340,  
654 5.3mg/ml stock).

655 Treatment with exogenous compounds during larval infected was performed by adding  
656 compounds (or equivalent solvent) to fish water (E3) to achieve the desired concentration. Fish  
657 were immersed in compound supplemented E3 throughout the experiment from the time of  
658 injection.

#### 659 **Zebrafish fungal burden measurement**

660 Individual infected zebrafish embryos were placed into single wells of a 96 well plate (VWR) with  
661 200 ul of E3 (unsupplemented E3, or E3 supplemented with eicosanoids / drugs depending on  
662 the assay). Infected embryos were imaged at 0 days post infection (dpi), 1 dpi, 2 dpi and 3 dpi in  
663 their 96 well plates using a Nikon Ti-E with a CFI Plan Achromat UW 2X N.A 0.06 objective  
664 lens. Images were captured with a Neo sCMOS (Andor, Belfast, UK) and NIS Elements (Nikon,  
665 Richmond, UK). Images were exported from NIS Elements into Image J FIJI as monochrome tif  
666 files. Images were thresholded in FIJI using the 'moments' threshold preset and converted to  
667 binary images to remove all pixels in the image that did not correspond to the intensity of the  
668 fluorescently tagged *C. neoformans*. The outline of the embryo was traced using the 'polygon'  
669 ROI tool, avoiding autofluorescence from the yolk sac. The total number of pixels in the  
670 thresholded image were counted using the FIJI 'analyse particles' function, the 'total area'  
671 measurement from the 'summary' readout was used for the total number of GFP<sup>+</sup> pixels in each  
672 embryo.

#### 673 **PPAR- $\gamma$ GFP reporter fish treatment**

674 PPAR $\gamma$  embryos were collected from homozygous ligand trap fish (F18). Embryos were raised  
675 in a temperature-controlled water system under LD cycle at 28.5° C. in 0.5x E2 media in petri-  
676 dishes till 1 dpf. Any developmentally delayed (dead or unfertilized) embryos were removed.  
677 Chorions were removed enzymatically with Pronase (1mg/ml) and specimens were dispensed  
678 into 24 well plates (10 per well) in 0.5x E2 media. For embryos 1% DMSO was used as a vehicle

679 control. Chemicals were stored in DMSO, diluted appropriately and added individually to 400 ul  
680 of 0.5×E2 media with 0.05 U/ml penicillin and 50 ng/ml streptomycin and vortexed intensively for  
681 1 min. 0.5×E2 media was removed from all wells with embryos and the 400 ul chemical  
682 solutions were administered to different wells to embryos. For drug treatment embryos were  
683 pre-incubated for 1 hour with compounds and then heat induced (28→37° C.) for 30 min in a  
684 water bath. Embryos were incubated at 28°C for 18 h and then monitored using a fluorescent  
685 dissection scope (SteREO Lumar.V12 Carl Zeiss) at 2 dpf. For analyzing GFP fluorescent  
686 pattern, embryos were anesthetized with Tricaine (Sigma, Cat.# A-5040) and mounted in 2 %  
687 methyl cellulose.

#### 688 **Whole body macrophage counts**

689 2 dpf transgenic zebrafish larvae which have fluorescently tagged macrophages due to an  
690 mCherry fluorescent protein driven by the macrophage specific gene marker *mpeg1* (57)  
691 *Tg(mpeg1:mCherryCAAX)sh378* (22) were treated with 10 μM PGE<sub>2</sub>, 10 μM 15-keto-PGE<sub>2</sub> or  
692 an equivalent DMSO control for 2 days. Larvae were then anesthetized by immersion in 0.168  
693 mg/ml tricaine in E3 and imaged using a Nikon Ti-E with a Nikon Plan APO 20x/ 0.75 DIC N2  
694 objective lens, taking z stacks of the entire body with 15 μM z steps. Macrophage counts were  
695 made manually using ImageJ from maximum projections.

#### 696 **Eicosanoid measurement (ELISA)**

697 J774 macrophages were seeded into 24 well plates at a concentration of 1×10<sup>5</sup> per well and  
698 incubated for 24 hours at 37 °C 5 % CO<sub>2</sub>. J774 cells were infected with *C. neoformans* as  
699 described above, at the same MOI 1:10 and incubated for 18 hours with 1ml serum free DMEM.  
700 At 18 hours post infection the supernatant was removed for ELISA analysis.

701 For ELISA analysis with aspirin treatment, wells requiring aspirin had supernatants removed  
702 and replaced with fresh DMEM containing 1mM aspirin in 1% DMSO. Cells were left for 24

703 hours total. At 24 hours all wells received fresh serum free media. Wells requiring aspirin for the  
704 duration received 1mM aspirin in DMSO. Aspirin treated cells requiring arachidonic acid were  
705 treated with 30 µg per ml arachidonic acid in ethanol. Control wells received the following: either  
706 1% DMSO, 30 µg per ml arachidonic acid, or ethanol. Cells were again left at 37 °C 5 % CO<sub>2</sub> for  
707 18 hours.

708 Supernatants were then removed and frozen at -80 °C until use. Supernatants were analysed  
709 as per the PGE<sub>2</sub> EIA ELISA kit instructions (Cayman Chemical).

#### 710 **Eicosanoid measurement (Mass spectrometry)**

711 J774 macrophages were seeded into T25 tissue culture flasks at a concentration of 1.3x10<sup>6</sup>  
712 cells per flask and incubated for 24 hours at 37 °C 5 % CO<sub>2</sub>. J774 cells were infected with *C.*  
713 *neoformans* as described above, at the same MOI 1:10 and incubated for 18 hours with 2 ml  
714 serum free DMEM. At 18 hours post infection infected cells were scraped from the flask with a  
715 cell scraper into the existing supernatant and immediately snap frozen in ethanol / dry ice slurry.  
716 All samples were stored at -80 °C before analysis.

717 Lipids and lipid standards were purchased from Cayman Chemical (Ann Arbor, Michigan).  
718 Deuterated standard Prostaglandin E<sub>2</sub>-d<sub>4</sub> (PGE<sub>2</sub>-d<sub>4</sub>), ≥98% deuterated form. HPLC grade  
719 solvents were from Thermo Fisher Scientific (Hemel Hempstead, Hertfordshire UK).

720 Lipids were extracted by adding a solvent mixture (1 mol/L acetic acid, isopropyl alcohol,  
721 hexane (2:20:30, v/v/v)) to the sample at a ratio of 2.5 –1 ml sample, vortexing, and then adding  
722 2.5 ml of hexane (58). Where quantitation was required, 2 ng PGE<sub>2</sub>-d<sub>4</sub>, was added to samples  
723 before extraction, as internal standard. After vortexing and centrifugation, lipids were recovered  
724 in the upper hexane layer. The samples were then re-extracted by addition of an equal volume  
725 of hexane. The combined hexane layers were dried and analyzed for Prostaglandin E<sub>2</sub> (PGE<sub>2</sub>)  
726 using LC-MS/MS as below.

727 Lipid extracts were separated by reverse-phase HPLC using a ZORBAX RRHD Eclipse Plus  
728 95Å C18, 2.1 x 150 mm, 1.8 µm column (Agilent Technologies, Cheshire, UK), kept in a column  
729 oven maintained at 45°C. Lipids were eluted with a mobile phase consisting of A, water-B-acetic  
730 acid of 95:5:0.01 (vol/vol/vol), and B, acetonitrile-methanol-acetic acid of 80:15:0.01 (vol/vol/vol),  
731 in a gradient starting at 30% B. After 1 min that was ramped to 35% over 3 min, 67.5% over 8.5  
732 min and to 100% over 5 min. This was subsequently maintained at 100% B for 3.5 min and then  
733 at 30% B for 1.5 min, with a flow rate of 0.5 ml/min. Products were monitored by LC/MS/MS in  
734 negative ion mode, on a 6500 Q-Trap (Sciex, Cheshire, United Kingdom) using parent-to-  
735 daughter transitions of  $m/z$  351.2 → 271.2 (PGE<sub>2</sub>), and  $m/z$  355.2 → 275.2 for PGE<sub>2</sub>-d<sub>4</sub>. ESI-  
736 MS/MS conditions were: TEM 475 °C, GS1 60, GS2 60, CUR 35, IS -4500 V, dwell time 75 s,  
737 DP -60 V, EP -10 V, CE -25 V and CXP at -10 V. PGE<sub>2</sub> was quantified using standard curves  
738 generated by varying PGE<sub>2</sub> with a fixed amount of PGE<sub>2</sub>-d<sub>4</sub>.

### 739 **Acknowledgments**

740 We thank the Bateson Centre aquaria staff for their assistance with zebrafish husbandry and the  
741 Johnston, Renshaw and Elks labs for critical discussions. We also thank Arturo Casadevall  
742 (Johns Hopkins University, Maryland USA) for providing the 18B7 antibody.

743

744

745

746



- 747 (1) Brown GD, Denning DW, Gow NA, Levitz SM, Netea MG, White TC. Hidden killers: human  
748 fungal infections. *Sci Transl Med* 2012 Dec 19;4(165):165rv13.
- 749 (2) Rajasingham R, Smith RM, Park BJ, Jarvis JN, Govender NP, Chiller TM, et al. Global  
750 burden of disease of HIV-associated cryptococcal meningitis: an updated analysis. *Lancet Infect*  
751 *Dis* 2017 May 5.
- 752 (3) Kawakami K, Kohno S, Kadota J, Tohyama M, Teruya K, Kudeken N, et al. T cell-dependent  
753 activation of macrophages and enhancement of their phagocytic activity in the lungs of mice  
754 inoculated with heat-killed *Cryptococcus neoformans*: involvement of IFN-gamma and its  
755 protective effect against cryptococcal infection. *Microbiol Immunol* 1995;39(2):135-143.
- 756 (4) Voelz K, Lammas DA, May RC. Cytokine signaling regulates the outcome of intracellular  
757 macrophage parasitism by *Cryptococcus neoformans*. *Infect Immun* 2009 Aug;77(8):3450-3457.
- 758 (5) Leopold Wager CM, Hole CR, Wozniak KL, Olszewski MA, Wormley FL, Jr. STAT1 signaling  
759 is essential for protection against *Cryptococcus neoformans* infection in mice. *J Immunol* 2014  
760 Oct 15;193(8):4060-4071.
- 761 (6) Chrétien F, Lortholary O, Kansau I, Neuville S, Gray F, Dromer F. Pathogenesis of cerebral  
762 *Cryptococcus neoformans* infection after fungemia. *J Infect Dis* 2002 Aug;186:522-530.
- 763 (7) Charlier C, Nielsen K, Daou S, Brigitte M, Chretien F, Dromer F. PMC2612285; Evidence of  
764 a role for monocytes in dissemination and brain invasion by *Cryptococcus neoformans*. *Infect*  
765 *Immun* 2009 Jan;77:120-127.
- 766 (8) Gilbert AS, Seoane PI, Sephton-Clark P, Bojarczuk A, Hotham R, Giurisato E, et al.  
767 Vomocytosis of live pathogens from macrophages is regulated by the atypical MAP kinase  
768 ERK5. *Sci Adv* 2017 08/16;3(8).
- 769 (9) Smith LM, Dixon EF, May RC. The fungal pathogen *Cryptococcus neoformans* manipulates  
770 macrophage phagosome maturation. *Cell Microbiol* 2015 May;17(5):702-713.
- 771 (10) Norris PC, Reichart D, Dumlao DS, Glass CK, Dennis EA. Specificity of eicosanoid  
772 production depends on the TLR-4-stimulated macrophage phenotype. *J Leukoc Biol* 2011  
773 Sep;90(3):563-574.
- 774 (11) Gupta S, Maurya MR, Stephens DL, Dennis EA, Subramaniam S. An integrated model of  
775 eicosanoid metabolism and signaling based on lipidomics flux analysis. *Biophys J* 2009 Jun  
776 3;96(11):4542-4551.
- 777 (12) Harizi H. The immunobiology of prostanoid receptor signaling in connecting innate and  
778 adaptive immunity. *Biomed Res Int* 2013;2013:683405.
- 779 (13) Angeli V, Faveeuw C, Roye O, Fontaine J, Teissier E, Capron A, et al. Role of the parasite-  
780 derived prostaglandin D2 in the inhibition of epidermal Langerhans cell migration during  
781 schistosomiasis infection. *J Exp Med* 2001 May 21;193(10):1135-1147.

- 782 (14) Ahmadi M, Emery DC, Morgan DJ. Prevention of both direct and cross-priming of antitumor  
783 CD8+ T-cell responses following overproduction of prostaglandin E2 by tumor cells in vivo.  
784 *Cancer Res* 2008 Sep 15;68(18):7520-7529.
- 785 (15) Harizi H, Corcuff JB, Gualde N. Arachidonic-acid-derived eicosanoids: roles in biology and  
786 immunopathology. *Trends Mol Med* 2008 Oct;14:461-469.
- 787 (16) Noverr MC, Erb-Downward JR, Huffnagle GB. Production of eicosanoids and other  
788 oxylipins by pathogenic eukaryotic microbes. *Clin Microbiol Rev* 2003 Jul;16(3):517-533.
- 789 (17) Erb-Downward JR, Huffnagle GB. *Cryptococcus neoformans* produces authentic  
790 prostaglandin E2 without a cyclooxygenase. *Eukaryot Cell* 2007 Feb;6(2):346-350.
- 791 (18) Erb-Downward JR, Noggle RM, Williamson PR, Huffnagle GB. The role of laccase in  
792 prostaglandin production by *Cryptococcus neoformans*. *Mol Microbiol* 2008 Jun;68(6):1428-  
793 1437.
- 794 (19) Noverr MC, Cox GM, Perfect JR, Huffnagle GB. PMC148814; Role of PLB1 in pulmonary  
795 inflammation and cryptococcal eicosanoid production. *Infect Immun* 2003 Mar;71:1538-1547.
- 796 (20) Shen L, Liu Y. Prostaglandin E2 blockade enhances the pulmonary anti-*Cryptococcus*  
797 *neoformans* immune reaction via the induction of TLR-4. *Int Immunopharmacol* 2015  
798 Sep;28(1):376-381.
- 799 (21) Evans RJ, Li Z, Hughes WS, Djordjevic JT, Nielsen K, May RC. Cryptococcal  
800 Phospholipase B1 (Plb1) is required for intracellular proliferation and control of titan cell  
801 morphology during macrophage infection. *Infect Immun* 2015 Jan 20.
- 802 (22) Bojarczuk A, Miller KA, Hotham R, Lewis A, Ogryzko NV, Kamuyango AA, et al.  
803 *Cryptococcus neoformans* Intracellular Proliferation and Capsule Size Determines Early  
804 Macrophage Control of Infection. *Sci Rep* 2016 Feb 18;6:21489.
- 805 (23) Cox GM, McDade HC, Chen SC, Tucker SC, Gottfredsson M, Wright LC, et al. Extracellular  
806 phospholipase activity is a virulence factor for *Cryptococcus neoformans*. *Mol Microbiol* 2001  
807 Jan;39:166-175.
- 808 (24) Chayakulkeeree M, Johnston SA, Oei JB, Lev S, Williamson PR, Wilson CF, et al. SEC14  
809 is a specific requirement for secretion of phospholipase B1 and pathogenicity of *Cryptococcus*  
810 *neoformans*. *Mol Microbiol* 2011 May;80:1088-1101.
- 811 (25) Ohno H, Morikawa Y, Hirata F. Studies on 15-hydroxyprostaglandin dehydrogenase with  
812 various prostaglandin analogues. *J Biochem* 1978 Dec;84(6):1485-1494.
- 813 (26) North TE, Goessling W, Walkley CR, Lengerke C, Kopani KR, Lord AM, et al.  
814 Prostaglandin E2 regulates vertebrate haematopoietic stem cell homeostasis. *Nature* 2007 Jun  
815 21;447(7147):1007-1011.
- 816 (27) Ricciotti E, FitzGerald GA. Prostaglandins and inflammation. *Arterioscler Thromb Vasc Biol*  
817 2011 May;31(5):986-1000.

- 818 (28) Noverr MC, Phare SM, Toews GB, Coffey MJ, Huffnagle GB. Pathogenic yeasts  
819 *Cryptococcus neoformans* and *Candida albicans* produce immunomodulatory prostaglandins.  
820 *Infect Immun* 2001 May;69(5):2957-2963.
- 821 (29) Loynes CA, Lee JA, Robertson AL, Steel MJ, Ellett F, Feng Y, et al. PGE2 production at  
822 sites of tissue injury promotes an anti-inflammatory neutrophil phenotype and determines the  
823 outcome of inflammation resolution in vivo. *Sci Adv* 2018 Sep 5;4(9):eaar8320.
- 824 (30) Voelz K, Johnston SA, Smith LM, Hall RA, Idnurm A, May RC. 'Division of labour' in  
825 response to host oxidative burst drives a fatal *Cryptococcus gattii* outbreak. *Nat Commun* 2014  
826 Oct 17;5:5194.
- 827 (31) Voelz K, Johnston SA, Rutherford JC, May RC. Automated analysis of cryptococcal  
828 macrophage parasitism using GFP-tagged cryptococci. *PLoS One* 2010 Dec 31;5(12):e15968.
- 829 (32) Chou WL, Chuang LM, Chou CC, Wang AH, Lawson JA, FitzGerald GA, et al. Identification  
830 of a novel prostaglandin reductase reveals the involvement of prostaglandin E2 catabolism in  
831 regulation of peroxisome proliferator-activated receptor gamma activation. *J Biol Chem* 2007  
832 Jun 22;282(25):18162-18172.
- 833 (33) Alleva DG, Johnson EB, Lio FM, Boehme SA, Conlon PJ, Crowe PD. Regulation of murine  
834 macrophage proinflammatory and anti-inflammatory cytokines by ligands for peroxisome  
835 proliferator-activated receptor-gamma: counter-regulatory activity by IFN-gamma. *J Leukoc Biol*  
836 2002 Apr;71(4):677-685.
- 837 (34) Maggi LB, Jr, Sadeghi H, Weigand C, Scarim AL, Heitmeier MR, Corbett JA. Anti-  
838 inflammatory actions of 15-deoxy-delta 12,14-prostaglandin J2 and troglitazone: evidence for  
839 heat shock-dependent and -independent inhibition of cytokine-induced inducible nitric oxide  
840 synthase expression. *Diabetes* 2000 Mar;49(3):346-355.
- 841 (35) Jiang C, Ting AT, Seed B. PPAR-gamma agonists inhibit production of monocyte  
842 inflammatory cytokines. *Nature* 1998 Jan;391:82-86.
- 843 (36) Tiefenbach J, Moll PR, Nelson MR, Hu C, Baev L, Kislinger T, et al. A live zebrafish-based  
844 screening system for human nuclear receptor ligand and cofactor discovery. *PLoS One* 2010  
845 Mar 22;5(3):e9797.
- 846 (37) Tiefenbach J, Magomedova L, Liu J, Reunov AA, Tsai R, Eappen NS, et al. Idebenone and  
847 coenzyme Q10 are novel PPARalpha/gamma ligands, with potential for treatment of fatty liver  
848 diseases. *Dis Model Mech* 2018 Aug 31;11(9):10.1242/dmm.034801.
- 849 (38) Atanasov AG, Wang JN, Gu SP, Bu J, Kramer MP, Baumgartner L, et al. Honokiol: a non-  
850 adipogenic PPARgamma agonist from nature. *Biochim Biophys Acta* 2013 Oct;1830(10):4813-  
851 4819.
- 852 (39) Bhalla K, Hwang BJ, Choi JH, Dewi R, Ou L, Mclenithan J, et al. N-Acetylfarnesylcysteine  
853 is a novel class of peroxisome proliferator-activated receptor gamma ligand with partial and full  
854 agonist activity in vitro and in vivo. *J Biol Chem* 2011 Dec 2;286(48):41626-41635.

- 855 (40) Bouhlel MA, Derudas B, Rigamonti E, Dievart R, Brozek J, Haulon S, et al. PPARgamma  
856 activation primes human monocytes into alternative M2 macrophages with anti-inflammatory  
857 properties. *Cell Metab* 2007 Aug;6(2):137-143.
- 858 (41) Bonfield TL, Thomassen MJ, Farver CF, Abraham S, Koloze MT, Zhang X, et al.  
859 Peroxisome proliferator-activated receptor-gamma regulates the expression of alveolar  
860 macrophage macrophage colony-stimulating factor. *J Immunol* 2008 Jul 1;181(1):235-242.
- 861 (42) Odegaard JI, Ricardo-Gonzalez RR, Goforth MH, Morel CR, Subramanian V, Mukundan L,  
862 et al. Macrophage-specific PPARgamma controls alternative activation and improves insulin  
863 resistance. *Nature* 2007 Jun 28;447(7148):1116-1120.
- 864 (43) Tenor JL, Oehlers SH, Yang JL, Tobin DM, Perfect JR. Live Imaging of Host-Parasite  
865 Interactions in a Zebrafish Infection Model Reveals Cryptococcal Determinants of Virulence and  
866 Central Nervous System Invasion. *MBio* 2015 Sep 29;6(5):e01425-15.
- 867 (44) Valdez PA, Vithayathil PJ, Janelins BM, Shaffer AL, Williamson PR, Datta SK.  
868 Prostaglandin E2 suppresses antifungal immunity by inhibiting interferon regulatory factor 4  
869 function and interleukin-17 expression in T cells. *Immunity* 2012 Apr 20;36(4):668-679.
- 870 (45) Salas SD, Bennett JE, Kwon-Chung KJ, Perfect JR, Williamson PR. Effect of the laccase  
871 gene CNLAC1, on virulence of *Cryptococcus neoformans*. *J Exp Med* 1996 Aug 1;184(2):377-  
872 386.
- 873 (46) Qiu Y, Davis MJ, Dayrit JK, Hadd Z, Meister DL, Osterholzer JJ, et al. Immune modulation  
874 mediated by cryptococcal laccase promotes pulmonary growth and brain dissemination of  
875 virulent *Cryptococcus neoformans* in mice. *PLoS One* 2012;7(10):e47853.
- 876 (47) Coggins KG, Latour A, Nguyen MS, Audoly L, Coffman TM, Koller BH. Metabolism of  
877 PGE2 by prostaglandin dehydrogenase is essential for remodeling the ductus arteriosus. *Nat*  
878 *Med* 2002 Feb;8(2):91-92.
- 879 (48) Lemberger T, Desvergne B, Wahli W. Peroxisome proliferator-activated receptors: a  
880 nuclear receptor signaling pathway in lipid physiology. *Annu Rev Cell Dev Biol* 1996;12:335-  
881 363.
- 882 (49) Pochetti G, Godio C, Mitro N, Caruso D, Galmozzi A, Scurati S, et al. Insights into the  
883 mechanism of partial agonism: crystal structures of the peroxisome proliferator-activated  
884 receptor gamma ligand-binding domain in the complex with two enantiomeric ligands. *J Biol*  
885 *Chem* 2007 Jun 8;282(23):17314-17324.
- 886 (50) Bruning JB, Chalmers MJ, Prasad S, Busby SA, Kamenecka TM, He Y, et al. Partial  
887 agonists activate PPARgamma using a helix 12 independent mechanism. *Structure* 2007  
888 Oct;15(10):1258-1271.
- 889 (51) Guasch L, Sala E, Castell-Auvi A, Cedo L, Liedl KR, Wolber G, et al. Identification of  
890 PPARgamma partial agonists of natural origin (I): development of a virtual screening procedure  
891 and in vitro validation. *PLoS One* 2012;7(11):e50816.

- 892 (52) Burgermeister E, Schnoebelen A, Flament A, Benz J, Stihle M, Gsell B, et al. A novel  
893 partial agonist of peroxisome proliferator-activated receptor-gamma (PPARgamma) recruits  
894 PPARgamma-coactivator-1alpha, prevents triglyceride accumulation, and potentiates insulin  
895 signaling in vitro. *Mol Endocrinol* 2006 Apr;20(4):809-830.
- 896 (53) Tiefenbach J, Moll PR, Nelson MR, Hu C, Baev L, Kislinger T, et al. A live zebrafish-based  
897 screening system for human nuclear receptor ligand and cofactor discovery. *PLoS One* 2010  
898 Mar 22;5(3):e9797.
- 899 (54) Day RO, Graham GG. Non-steroidal anti-inflammatory drugs (NSAIDs). *BMJ* 2013 Jun  
900 11;346:f3195.
- 901 (55) White RM, Sessa A, Burke C, Bowman T, LeBlanc J, Ceol C, et al. Transparent adult  
902 zebrafish as a tool for in vivo transplantation analysis. *Cell Stem Cell* 2008 Feb 7;2(2):183-189.
- 903 (56) Zhu X, Williamson PR. Role of laccase in the biology and virulence of *Cryptococcus*  
904 *neoformans*. *FEMS Yeast Res* 2004 Oct;5(1):1-10.
- 905 (57) Ellett F, Pase L, Hayman JW, Andrianopoulos A, Lieschke GJ. Mpeg1 Promoter  
906 Transgenes Direct Macrophage-Lineage Expression in Zebrafish. *Blood* 2011 Jan  
907 27;117(4):e49-56.
- 908 (58) Maskrey BH, Bermudez-Fajardo A, Morgan AH, Stewart-Jones E, Dioszeghy V, Taylor  
909 GW, et al. Activated platelets and monocytes generate four hydroxyphosphatidylethanolamines  
910 via lipoxygenase. *J Biol Chem* 2007 Jul 13;282(28):20151-20163.
- 911
- 912

913 **Fig1**

914 **The intracellular proliferation defect of the *C. neoformans* mutant  $\Delta plb1$ , can be reversed**

915 **with the addition of exogenous prostaglandin E<sub>2</sub>.** J774 murine macrophages were infected

916 with  $\Delta plb1$ , the parental strain H99 or a genetic reconstitute strain  $\Delta plb1:PLB1$ . Infected cells

917 were left untreated or treated with 2 nM PGE<sub>2</sub> or an equivalent solvent (ethanol) control. Mean

918 IPR from 5 biological repeats shown with error bars representing standard deviation. An

919 unpaired two tailed Student's t-test was performed to compare each treatment group. H99 etoh

920 vs H99 2 nM PGE<sub>2</sub> ns p = 0.7212,  $\Delta plb1$  etoh vs.  $\Delta plb1$  2 nM PGE<sub>2</sub> \* p = 0.0376,  $\Delta plb1:PLB1$

921 etoh vs.  $\Delta plb1:PLB1$  2 nM PGE<sub>2</sub> ns p=0.723.

922

923 **Fig2**

924 **The prostaglandin E<sub>2</sub> dependent growth defect of  $\Delta plb1$  is also present *in vivo*: A i** H99-

925 GFP infected larvae imaged at 0, 1, 2 and 3 dpi. At least 50 larvae measured per time point

926 across 3 biological repeats. Box and whiskers show median, 5<sup>th</sup> percentile and 95<sup>th</sup> percentile.

927 Unpaired Mann-Whitney U tests used to compare the burden between each strain for every time

928 point, for p values see (Supplementary Fig 1B ii). **B i** – H99-GFP Infected larvae treated with 10

929  $\mu$ M prostaglandin E<sub>2</sub> or equivalent solvent (DMSO) control. At least 60 larvae measured per

930 treatment group from 3 biological repeats. Box and whiskers show median, 5<sup>th</sup> percentile and

931 95<sup>th</sup> percentile. Unpaired Mann-Whitney U tests used to compare between treatments DMSO

932 vs. 10  $\mu$ M PGE<sub>2</sub> \* p = 0.0137 (threshold for significance 0.017, corrected for multiple

933 comparisons). **C i**, H99-GFP Infected larvae treated with 10  $\mu$ M prostaglandin D<sub>2</sub> or equivalent

934 solvent (DMSO) control. At least 60 larvae measured per treatment group from 4 biological

935 repeats. Box and whiskers show median, 5<sup>th</sup> percentile and 95<sup>th</sup> percentile. Unpaired Mann-

936 Whitney U tests used to compare between treatments DMSO vs. 10  $\mu$ M PGD<sub>2</sub>, ns p= 0.8 **D i**

937  $\Delta plb1$ -GFP infected larvae (500 cell inoculum injected at 2 dpf) imaged at 0, 1, 2 and 3 dpi. N =

938 3. Box and whiskers show median, 5<sup>th</sup> percentile and 95<sup>th</sup> percentile. At least 87 larvae



939 measured for each time point from 3 biological repeats. Unpaired Mann-Whitney U tests used to  
940 compare the burden between each strain for every time point, for p values see (Supplementary  
941 Fig 1 A i + A ii). **E i**  $\Delta plb1$ -GFP Infected larvae treated with 10  $\mu$ M prostaglandin  $E_2$  or equivalent  
942 solvent (DMSO) control. At least 35 larvae measured per treatment group from 2 biological  
943 repeats. Box and whiskers show median, 5<sup>th</sup> percentile and 95<sup>th</sup> percentile. Unpaired Mann-  
944 Whitney U tests used to compare between treatments  $\Delta plb1$ -GFP DMSO vs 10  $\mu$ M PGE<sub>2</sub> \*\*\* p =  
945 0.0001 (threshold for significance 0.017, corrected for multiple comparisons). **F i**  $\Delta plb1$ -GFP  
946 Infected larvae treated with 10  $\mu$ M prostaglandin  $D_2$  or equivalent solvent (DMSO) control. At  
947 least 45 larvae measured per treatment group from 3 biological repeats. Box and whiskers show  
948 median, 5<sup>th</sup> percentile and 95<sup>th</sup> percentile. Unpaired Mann-Whitney U tests used to compare  
949 between treatments DMSO vs. 10  $\mu$ M PGD<sub>2</sub>. Ns p = 0.1 **A ii** Representative GFP images  
950 (representative = median value) H99-GFP infected larvae, untreated at 0,1,2,3 dpi. **B ii, C ii**  
951 Representative GFP images (representative = median value) H99-GFP infected larvae, at 2 dpi  
952 treated with 10  $\mu$ M PGE<sub>2</sub> (**B ii**) or PGD<sub>2</sub> (**C ii**). **D ii** Representative GFP images (representative  
953 = median value)  $\Delta plb1$ -GFP infected larvae, untreated at 0,1,2,3 dpi. **E ii, F ii** Representative  
954 GFP images (representative = median value)  $\Delta plb1$ -GFP infected larvae, at 2 dpi treated with  
955 10  $\mu$ M PGE<sub>2</sub> (**E ii**) or PGD<sub>2</sub> (**F ii**).

956

### 957 **Fig 3**

#### 958 **The observed activity of PGE<sub>2</sub> is due to its dehydrogenated derivative 15-keto-PGE<sub>2</sub>:**

959 Fungal burden measured at 2 days post infection (2 dpi) by counting GFP positive pixels in each  
960 larvae. **A i** H99-GFP Infected larvae treated with 10  $\mu$ M 16,16-dimethyl-prostaglandin  $E_2$  or  
961 equivalent solvent (DMSO) control. At least 75 larvae measured per treatment group from 4  
962 biological repeats. Box and whiskers show median, 5<sup>th</sup> percentile and 95<sup>th</sup> percentile. Unpaired  
963 Mann-Whitney U test used to compare between treatments, DMSO vs. 10  $\mu$ M 16, 16-dm PGE<sub>2</sub>  
964 ns p = 0.9954. **B i** H99-GFP Infected larvae treated with 10  $\mu$ M 15-keto-prostaglandin  $E_2$  or

965 equivalent solvent (DMSO) control. At least 55 larvae measured per treatment group from 3  
966 biological repeats. Unpaired Mann-Whitney U test used to compare between treatments DMSO  
967 vs. 10  $\mu$ M 15-keto-PGE<sub>2</sub> \*\* p = 0.0048 (threshold for significance 0.017, corrected for multiple  
968 comparisons). **C i**  $\Delta plb1$ -GFP Infected larvae treated with 10  $\mu$ M 16, 16-dimethyl prostaglandin  
969 E<sub>2</sub> or equivalent solvent (DMSO) control. At least 45 larvae per treatment group from 3  
970 biological repeats. Unpaired Mann-Whitney U test used to compare between treatments  $\Delta plb1$ -  
971 GFP DMSO vs 10  $\mu$ M 16, 16-dm PGE<sub>2</sub> ns p = 0.98. **D i**  $\Delta plb1$ -GFP Infected larvae treated with  
972 10  $\mu$ M 15-keto-prostaglandin E<sub>2</sub> or equivalent solvent (DMSO) control. At least 35 larvae  
973 measured per treatment group from 2 biological repeats. Unpaired Mann-Whitney U test used to  
974 compare between treatments DMSO vs 10  $\mu$ M 15-keto-PGE<sub>2</sub> \* p = 0.0119 (threshold for  
975 significance 0.017, corrected for multiple comparisons). **A ii, B ii** Representative GFP images  
976 (representative = median value) H99-GFP infected larvae, at 2dpi treated with 10  $\mu$ M 16,16-dm-  
977 PGE<sub>2</sub> (**A ii**) or 15-keto-PGE<sub>2</sub> (**B ii**). **C ii, D ii** Representative GFP images (representative =  
978 median value)  $\Delta plb1$ -GFP infected larvae, at 2dpi treated with 10  $\mu$ M 16,16-dm-PGE<sub>2</sub> (**C ii**) or  
979 15-keto-PGE<sub>2</sub> (**D ii**). **E** H99-GFP infected larvae treated with a combination of 3  $\mu$ M AH6809  
980 and 3  $\mu$ M GW627368X or equivalent solvent (DMSO) control. Box and whiskers show median,  
981 5<sup>th</sup> percentile and 95<sup>th</sup> percentile. At least 64 larvae measured per treatment group from 4  
982 biological repeats. Mann-Whitney U test used to compare between treatments, no significance  
983 found.

984

#### 985 **Fig 4**

986 **Host derived prostaglandins are not required for growth of *C. neoformans*:** **A** Intracellular  
987 proliferation quantified from timelapse movies of J774 macrophages infected with H99-GFP or  
988  $\Delta plb1$ -GFP and treated with 1 mM Aspirin – either for 18 hours before infection (pretreatment)  
989 or throughout the time course of infection. One-way ANOVA with Tukey post-test performed



990 comparing all conditions. H99-GFP DMSO vs.  $\Delta plb1$ -GFP DMSO \*\*\*  $p = 0.0002$ . H99-GFP  
991 DMSO vs.  $\Delta plb1$ -GFP 1 mM (pretreat) \*\*\*\*  $p = <0.0001$ . H99-GFP DMSO vs.  $\Delta plb1$ -GFP 1 mM  
992 aspirin \*\*\*  $p = 0.0001$ . H99-GFP + 1mM aspirin (pretreat) vs.  $\Delta plb1$ -GFP DMSO \*\*\*\*  $p <0.0001$ .  
993 H99-GFP + 1mM aspirin (pretreat) vs.  $\Delta plb1$ -GFP 1 mM aspirin (pretreat) \*\*\*\*  $p < 0.0001$ . H99-  
994 GFP + 1mM aspirin (pretreat) vs.  $\Delta plb1$ -GFP 1 mM aspirin \*\*\*\*  $p <0.0001$ . H99-GFP+ 1mM  
995 aspirin vs.  $\Delta plb1$ -GFP DMSO \*\*\*  $p = 0.0001$ . H99-GFP + 1mM aspirin vs.  $\Delta plb1$ -GFP 1 mM  
996 aspirin (pretreat) \*\*\*\*  $p <0.0001$ . H99-GFP+ 1mM aspirin vs.  $\Delta plb1$ -GFP 1 mM aspirin \*\*\*\*  $p <$   
997  $0.0001$ . **B i** H99-GFP infected larvae treated with 15  $\mu$ M NS-398, 15  $\mu$ M SC-560 or equivalent  
998 solvent (DMSO) control. Box and whiskers show median, 5<sup>th</sup> percentile and 95<sup>th</sup> percentile. At  
999 least 25 larvae measured per treatment group from 2 biological repeats. Mann-Whitney U test  
1000 used to compare between treatments, DMSO vs. 15  $\mu$ M \*\*\*  $p = 0.0002$ . **B ii**  $\Delta plb1$ -GFP infected  
1001 larvae treated with 15  $\mu$ M NS-398, 15  $\mu$ M SC-560 or equivalent solvent (DMSO) control. Box  
1002 and whiskers show median, 5<sup>th</sup> percentile and 95<sup>th</sup> percentile. At least 34 larvae measured per  
1003 treatment group from 2 biological repeats. Mann-Whitney U test used to compare between  
1004 treatments, no significance found. **C** 2 dpi zebrafish larvae crispants with CRISPR knockout  
1005 against Prostaglandin E<sub>2</sub> synthase (*ptges*) or a Tyrosinase control (*tyr*) infected with H99-GFP or  
1006  $\Delta plb1$ -GFP, fungal burden quantified at 0 dpi (**C i**) and 3 dpi (**C ii**) – data shown is a single  
1007 experiment but is representative of N=3 experiments. One way ANOVA with Tukey post-test  
1008 performed to compare each condition **C i** no significance found **C ii** H99-GFP + *tyr*<sup>-/-</sup> vs. H99-  
1009 GFP + *ptges*<sup>-/-</sup> \*  $p = 0.0390$ . H99-GFP + *ptges*<sup>-/-</sup> vs.  $\Delta plb1$ -GFP + *tyr*<sup>-/-</sup> \*  $p = 0.0313$ . H99-GFP  
1010 + *ptges*<sup>-/-</sup> vs.  $\Delta plb1$ -GFP + *ptges*<sup>-/-</sup> \*  $p = 0.0121$ . **D i** PGE<sub>2</sub> monoclonal EIA ELISA performed on  
1011 supernatants from *C. neoformans* infected macrophages collected at 18 hr post infection. Mean  
1012 concentration of PGE<sub>2</sub> (pg per 1x10<sup>6</sup> cells) plotted with SD, n = 4. One-way ANOVA with Tukey  
1013 post-test performed, no significance found. **D ii** LC MS/MS mass spectrometry analysis  
1014 performed on cell suspensions (infected J774 cells and supernatants) collected at 18 hr post  
1015 infection. Mean concentration of PGE<sub>2</sub> (pg per 1x10<sup>6</sup> cells) plotted with SD, n = 3. One-way

1016 ANOVA with Tukey post-test performed, no significance found. **E** J774 cells co-infected with a  
1017 50:50 mix of  $\Delta plb1$  and H99-GFP. **i** Diagrammatic representation of co-infection experiment.  
1018 GFP<sup>+</sup> (green) and GFP<sup>-</sup> (yellow) *C. neoformans* cells within the phagosome were quantified at 0  
1019 hr, macrophages with a burden ratio of 1:2 or 2:1 were re-analysed at 18 hr, the IPR for  $\Delta plb1$   
1020 within 2:1 and 1:2 co-infected cells were calculated by dividing the burden at 18hr by burden at  
1021 0 hr for GFP<sup>+</sup> (green) or GFP<sup>-</sup> (yellow) cells. **ii** Quantification of IPR for  $\Delta plb1$  cells within  
1022  $\Delta plb1$ :H99-GFP 2:1 or 1:2 co-infected macrophages. At least 35 co-infected macrophages were  
1023 analysed for each condition over 4 experimental repeats. Student's T test performed to compare  
1024 ratios – 2:1 vs 1:2 \* p = 0.0137.

1025

1026 **Fig 5 15-keto-PGE<sub>2</sub> promotes fungal burden by activating host PPAR- $\gamma$ .**

1027 **A i** J774 macrophages treated with Troglitazone (TLT - 0.25  $\mu$ M), an equivalent DMSO control  
1028 or infected with H99 or  $\Delta plb1$  fixed and stained at 18 hpi with Hoechst and antibody against  
1029 PPAR- $\gamma$ . Nuclear localization of PPAR- $\gamma$  quantified by measuring nuclear grey value of at least  
1030 30 cells per condition. A single experiment is shown that is representative of n = 2. One way  
1031 ANOVA with Tukey post-test used to compare all conditions. DMSO vs. TLT \*\* p = 0.0049.  
1032 DMSO vs H99 \*\* p = 0.0040. TLT vs  $\Delta plb1$  \* p = 0.0212. H99 vs.  $\Delta plb1$  \* p = 0.0187. **A ii**  
1033 Transgenic zebrafish larvae with a GFP PPAR- $\gamma$  reporter treated with DMSO, 250 nM  
1034 Troglitazone or 10  $\mu$ M 15-keto-PGE<sub>2</sub> + 250 nM Troglitazone overnight and imaged. Lateral  
1035 views of 2 dpf embryos, anterior to the left, are shown. **B** J774 murine macrophages infected  
1036 with  $\Delta plb1$  or the parental strain H99. Infected cells treated with 25  $\mu$ M GW9662 (a PPAR- $\gamma$   
1037 antagonist) or equivalent solvent (DMSO) control. Mean IPR from 6 biological repeats shown  
1038 with error bars representing standard deviation. An unpaired two tailed Student's t-test was  
1039 performed to compare each treatment group. H99 DMSO vs. H99 25  $\mu$ M GW9662 \* p = 0.026.

1040 **C**  $\Delta plb1$ -GFP infected larvae treated with 10  $\mu$ M 15-keto-PGE<sub>2</sub>, 500 nM GW9662, 10  $\mu$ M 15-  
1041 keto-PGE<sub>2</sub> + 500 nM GW9662 or an equivalent solvent (DMSO) control. Box and whiskers show  
1042 median, 5<sup>th</sup> percentile and 95<sup>th</sup> percentile. At least 35 larvae measured per treatment group from  
1043 2 biological repeats. Mann-Whitney U test used to compare between treatments. DMSO vs. 15-  
1044 keto-PGE<sub>2</sub> \*\*\*\* p < 0.0001 (threshold for significance 0.025, corrected for multiple comparisons),  
1045 15-keto-PGE<sub>2</sub> vs. 15-keto-PGE<sub>2</sub> + 500 nm GW9662 \*\* p = 0.005 (threshold for significance  
1046 0.025, corrected for multiple comparisons) **D-F** 2 day old (2 dpf) *Nacre* zebrafish larvae injected  
1047 with 500 cell inoculum. Fungal burden measured at 2 days post infection (2 dpi) by counting  
1048 GFP positive pixels within each larvae. **D i** H99-GFP Infected larvae treated with 0.55  $\mu$ M  
1049 Troglitazone (TLT) equivalent solvent (DMSO) control. Box and whiskers show median, 5<sup>th</sup>  
1050 percentile and 95<sup>th</sup> percentile. At least 55 larvae measured per treatment group over 3 biological  
1051 repeats. Mann-Whitney U test used to compare between treatments, DMSO vs. 0.55  $\mu$ M  
1052 Troglitazone \*\* p = 0.0044 (threshold for significance 0.025, corrected for multiple comparisons).  
1053 **E i**  $\Delta plb1$ -GFP infected larvae treated with 0.55  $\mu$ M Troglitazone (TLT) equivalent solvent  
1054 (DMSO) control. Box and whiskers show median, 5<sup>th</sup> percentile and 95<sup>th</sup> percentile. At least 35  
1055 larvae measured per treatment group from 2 biological repeats. Mann-Whitney U test used to  
1056 compare between treatments, DMSO vs. 0.55  $\mu$ M Troglitazone \*\* p = 0.0089 (threshold for  
1057 significance 0.025, corrected for multiple comparisons). **F i**  $\Delta lac1$ -GFP infected larvae treated  
1058 with 0.55  $\mu$ M Troglitazone (TLT) equivalent solvent (DMSO) control. At least 60 larvae  
1059 measured per treatment group from 3 biological repeats. Box and whiskers show median, 5<sup>th</sup>  
1060 percentile and 95<sup>th</sup> percentile, DMSO vs. 0.55  $\mu$ M Troglitazone \* p = 0.01 (threshold for  
1061 significance 0.025, corrected for multiple comparisons). **D ii, E ii and F ii**, Representative GFP  
1062 images (representative = median value) *C. neoformans* infected larvae, at 2 dpi treated with  
1063 0.55  $\mu$ M Troglitazone (TLT) **D ii** - H99-GFP, **E ii** -  $\Delta plb1$ -GFP and **F ii**  $\Delta lac1$ -GFP.

1064 **Supplementary Fig 1**

1065 **A** Quantification of the viability of *C. neoformans* retrieved from the phagosomes of J774  
1066 macrophages at 2 hr and 20 hr post infection. Prior to, and during infection J774 macrophages  
1067 were treated with 2 mM PGE<sub>2</sub> or the equivalent amount of solvent (Ethanol) *Cryptococcus* cells  
1068 were counted with a hemocytometer / diluted and plated to give an expected number of 200  
1069 CFU - dead *Cryptococcus* cells are indistinguishable from live cells when counting with a  
1070 hemocytometer however a lower than expected CFU count would indicate that there is a  
1071 decrease in viability. Data is displayed as the fold change between the CFU count at 2 hpi and  
1072 20 hpi for each condition. A one-way ANOVA with Tukey post test was performed comparing all  
1073 conditions. H99 ETOH vs.  $\Delta plb1$  \*\*  $p = 0.0052$ , H99 ETOH vs.  $\Delta plb1$  ETOH \*\*  $p = 0.0056$ , H99  
1074 ETOH vs.  $\Delta plb1$  2 mM PGE<sub>2</sub> \*  $p = 0.029$ . **B i** Comparison of fungal burden between H99-GFP,  
1075  $\Delta plb1$ -GFP and  $\Delta lac1$ -GFP infected larvae (Data reproduced from Fig2 Ai, Di and  
1076 Supplementary Fig 2 Bi for clarity) H99-GFP,  $\Delta plb1$ -GFP and  $\Delta lac1$ -GFP infected larvae imaged  
1077 at 0, 1, 2 and 3 dpi. At least 50 larvae measured per time point from 3 biological repeats. Box  
1078 and whiskers show median, 5<sup>th</sup> percentile and 95<sup>th</sup> percentile. Unpaired Mann-Whitney U tests  
1079 used to compare the burden between each strain for every time point. **B ii** Table of Mann-  
1080 Whitney U tests comparing burden for each strain between time points. **C** Whole body  
1081 macrophage counts of zebrafish larvae treated at 2 dpf with 10  $\mu$ M PGE<sub>2</sub>, 10  $\mu$ M 15-keto-PGE<sub>2</sub>  
1082 or an equivalent DMSO control for 2 days. Box and whiskers show median, 5<sup>th</sup> percentile and  
1083 95<sup>th</sup> percentile. At least 12 larvae quantified per treatment group per biological repeat  $n = 4$ .  
1084 Mann-Whitney U test used to treatments to DMSO control \*\*  $p = 0.0025$ .

## 1085 **Supplementary Fig 2**

1086 **A** J774 cells co-infected with a 50:50 mix of  $\Delta lac1$ -GFP and H99. Quantification of IPR for  
1087  $\Delta lac1$ -GFP cells within  $\Delta lac1$ -GFP:H99 2:1 or 1:2 co-infected macrophages. At least 20 co-  
1088 infected macrophages were analysed for each condition over 4 experimental repeats. Student's  
1089 T test performed to compare ratios – 2:1 vs 1:2 \*  $p = 0.012$ . **B i**  $\Delta lac1$ -GFP infected larvae

1090 imaged at 0, 1, 2 and 3 dpi. Fungal burden measured by counting GFP positive pixels in each  
1091 larvae. At least 78 larvae measured per time point across 3 biological repeats. Box and  
1092 whiskers show median, 5<sup>th</sup> percentile and 95<sup>th</sup> percentile. Unpaired Mann-Whitney U tests used  
1093 to compare the burden between each strain for every time point, for p values see  
1094 (Supplementary Fig2 A + B). **B ii** Representative GFP images (representative = median value)  
1095 of 2dpi  $\Delta lac1$ -GFP infected larvae, untreated at 0,1,2,3 dpi **C i**  $\Delta lac1$ -GFP Infected larvae  
1096 treated with 10  $\mu$ M prostaglandin E<sub>2</sub> or equivalent solvent (DMSO) control. At least 70 larvae  
1097 measured per treatment group across 4 biological repeats. Box and whiskers show median, 5<sup>th</sup>  
1098 percentile and 95<sup>th</sup> percentile. Unpaired Mann-Whitney U test used to compare between  
1099 treatments, DMSO vs. 10  $\mu$ M PGE<sub>2</sub> \* p = 0.035. **D i**  $\Delta lac1$ -GFP Infected larvae treated with 10  
1100  $\mu$ M 16,16-dimethyl prostaglandin E<sub>2</sub> or equivalent solvent (DMSO) control. At least 75 larvae  
1101 measured per treatment group across 4 biological repeats. Box and whiskers show median, 5<sup>th</sup>  
1102 percentile and 95<sup>th</sup> percentile. Unpaired Mann-Whitney U test used to compare between  
1103 treatments, DMSO vs. 10  $\mu$ M 16,16-dimethyl prostaglandin E<sub>2</sub> ns p = 0.062. **E i**  $\Delta lac1$ -GFP  
1104 Infected larvae treated with 10  $\mu$ M 15-keto-prostaglandin E<sub>2</sub> or equivalent solvent (DMSO)  
1105 control. At least 58 larvae measured per treatment group across 3 biological repeats. Unpaired  
1106 Mann-Whitney U test used to compare between treatments DMSO vs. 10  $\mu$ M 15-keto-  
1107 prostaglandin E<sub>2</sub> ns p= 0.50. **C ii**, **D ii**, **E ii** Representative GFP images (representative =  
1108 median value)  $\Delta lac1$ -GFP infected larvae, at 2 dpi treated with 10  $\mu$ M PGE<sub>2</sub> (**C ii**), 16,16-dm-  
1109 PGE<sub>2</sub> (**D ii**) or 15-keto-PGE<sub>2</sub> (**E ii**).

1110

### 1111 **Supplementary Fig 3**

1112 **A** PGE<sub>2</sub> monoclonal EIA ELISA performed on supernatants from *C. neoformans* infected  
1113 macrophages collected at 18 hr post infection. Mean concentration of PGE<sub>2</sub> (pg per 1x10<sup>6</sup> cells)  
1114 plotted with SD, n = 2. **B** Quantification of IPR for  $\Delta plb1$  cells within  $\Delta plb1$ :H99-GFP co-infected

1115 macrophages at initial burdens of 2:1, 3:1, 4:1 and vice versa. N=4. Student's T test performed  
1116 to compare ratios – 2:1 vs 1:2 \* p = 0.0137. **C** Example images of immunofluorescence  
1117 experiments in J774 macrophages staining for PPAR-gamma nuclear localization (for  
1118 quantification see Fig 5 Ai). J774 cells treated with DMSO, 0.25  $\mu$ M Troglitazone, infected with  
1119 H99-GFP or  $\Delta plb1$ -GFP at x60 magnification, scale bar = 10  $\mu$ M. Images provided are from the  
1120 Cy3 channel (PPAR-  $\gamma$ ) and the corresponding cell in DIC. The area of the nuclei is marked with  
1121 a white dotted line.

1122

#### 1123 **Supplementary Fig 4**

1124

1125 Genotyping to confirm zebrafish *ptges* CRISPR. Zebrafish were genotyped post assay (5 dpf),  
1126 an area of genomic DNA spanning the *ptges* gene ATG site (the CRISPR target) was amplified  
1127 with PCR to produce a 345 bp product. This product was digested with MwoI to produce  
1128 genotype specific banding patterns **A.** Schematic of the banding patterns expected for each  
1129 genotype following MwoI digestion – 1. Undigested product, a single 345 bp band 2. Wild type  
1130 genotype, 184, 109 and 52 bp bands 3. Heterozygous genotype (*ptges*<sup>+/−</sup>) 293, 184, 109 and 52  
1131 bp bands 4. Homozygous genotype (*ptges*<sup>−/−</sup>) strong bands for 293 and 52 bp, weaker bands at  
1132 184 and 109 bp can sometimes be seen indicating a small amount of wildtype *ptges* is still  
1133 present (this is thought to be beneficial as low levels of *ptges* are required for larvae survival. **B**  
1134 Genotyping for H99 infected larvae, L = DNA ladder (NEB 50 bp ladder), wt = undigested wild  
1135 type control, wt dig = wild type digested control, numbers correspond to individual larvae  
1136 genotyped. H99 + tyro = *tyr*<sup>−/−</sup> larvae infected with H99-GFP. H99 + *ptges* = *ptges*<sup>−/−</sup> larvae  
1137 infected with H99-GFP **C** Genotyping for  $\Delta plb1$  infected larvae, L = DNA ladder (NEB 50 bp  
1138 ladder), wt = undigested wild type control, wt dig = wild type digested control, numbers  
1139 correspond to individual larvae genotyped.  $\Delta plb1$ + tyro = *tyr*<sup>−/−</sup> larvae infected with  $\Delta plb1$ -GFP.  
1140  $\Delta plb1$ + *ptges* = *ptges*<sup>−/−</sup> larvae infected with  $\Delta plb1$ -GFP.

1141

1142

1143

Mean intracellular  
proliferation rate (IPR)

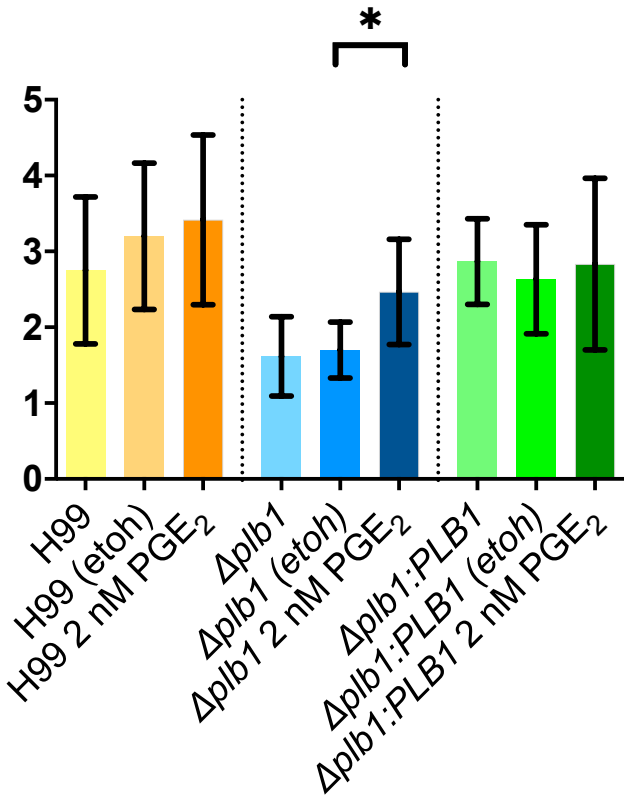



H99-GFP

**Ai**

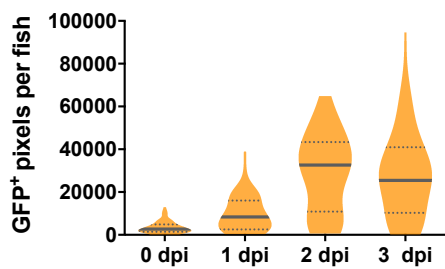

**Bi**

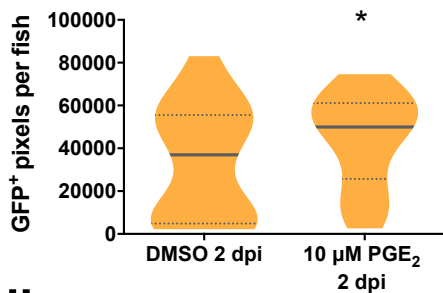

**Ci**

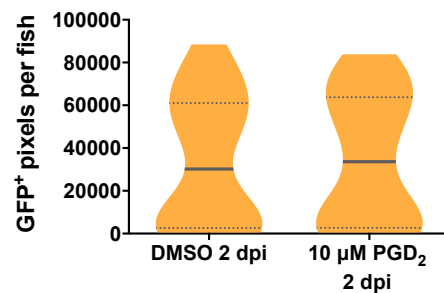

**i**

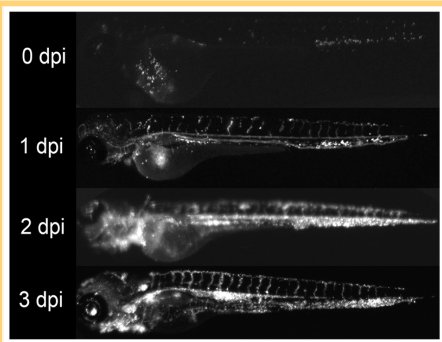

**ii**

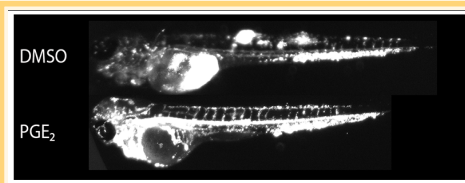

**ii**

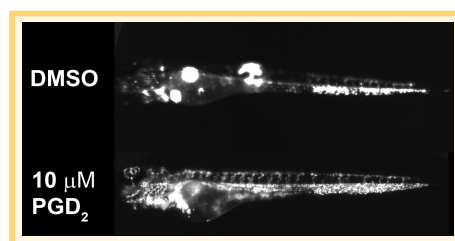

$\Delta plb1$ -GFP

**Di**

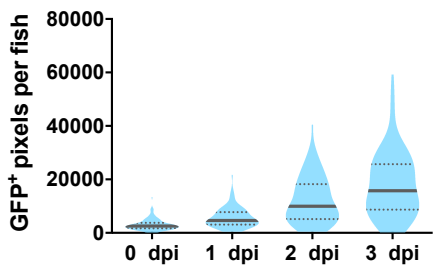

**Ei**

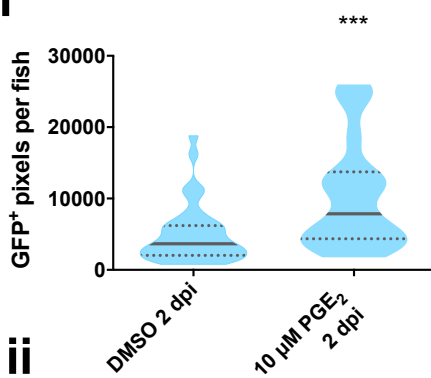

**Fi**

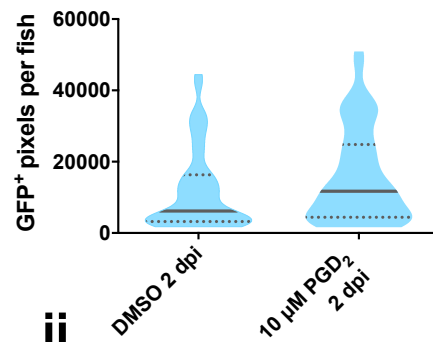

**ii**

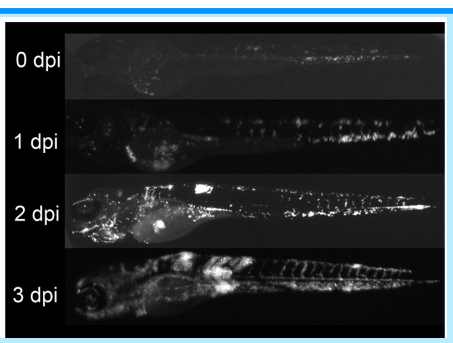

**ii**

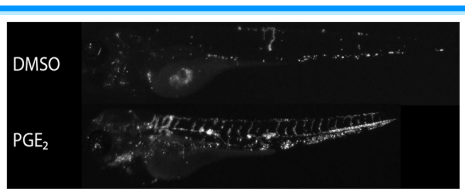

**ii**

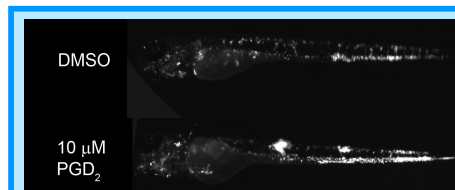

H99-GFP

**A i**

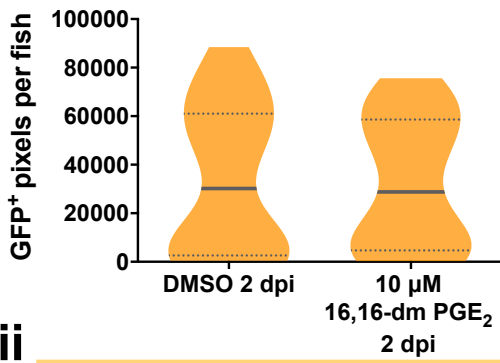

**B i**

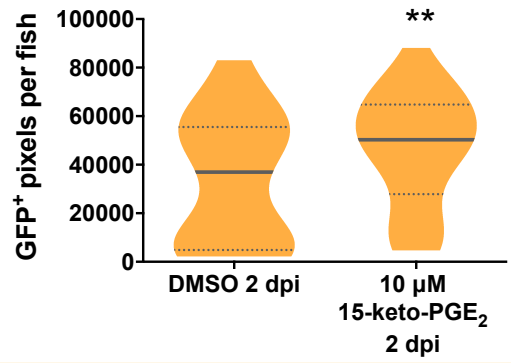

**ii**

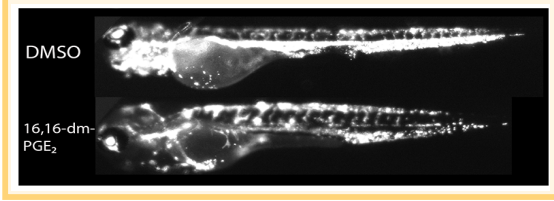

**ii**

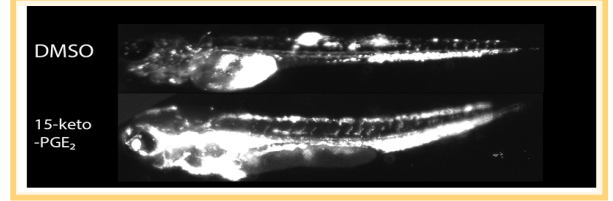

$\Delta$ *plb1*-GFP

**C i**

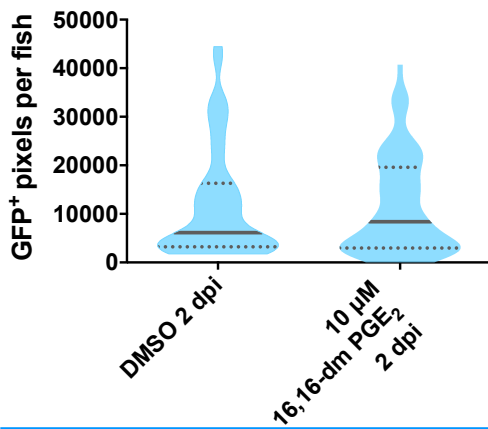

**D i**

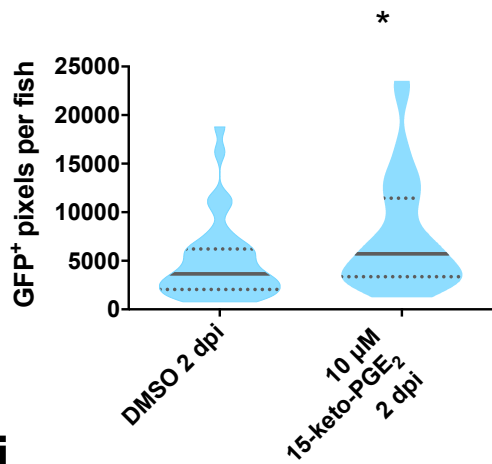

**ii**

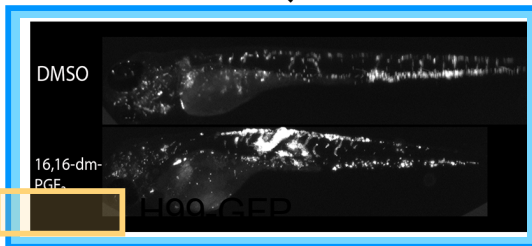

**ii**

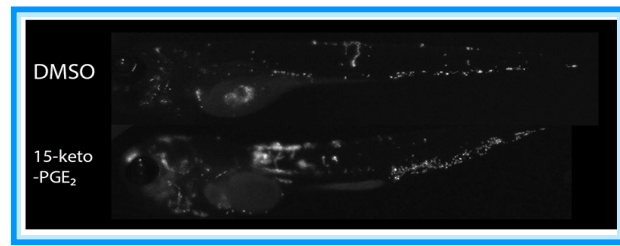

**E**

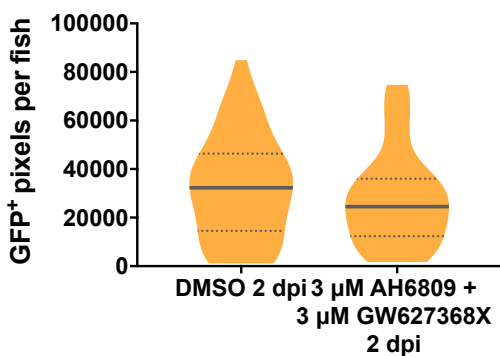

**A**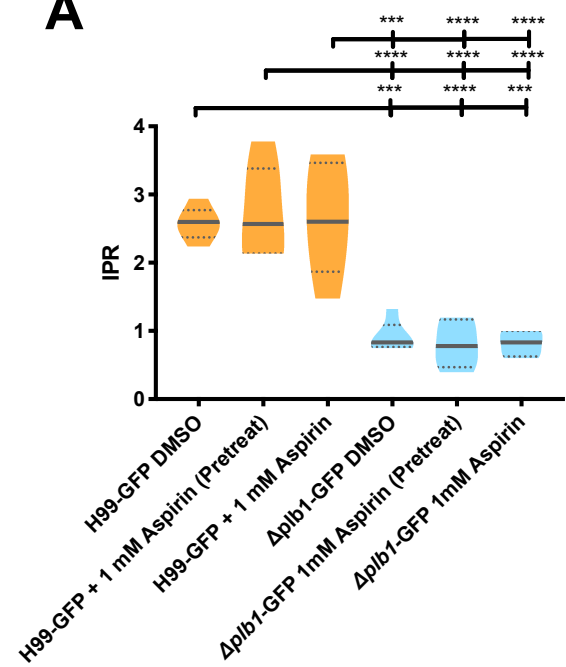**B i**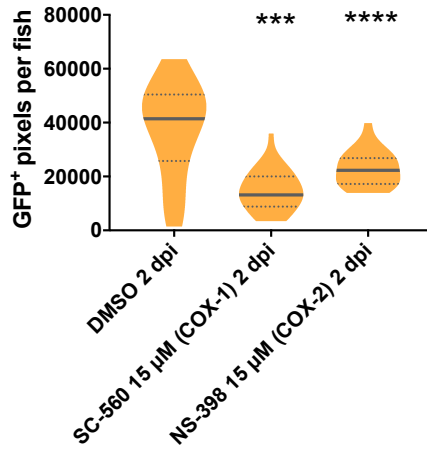**ii**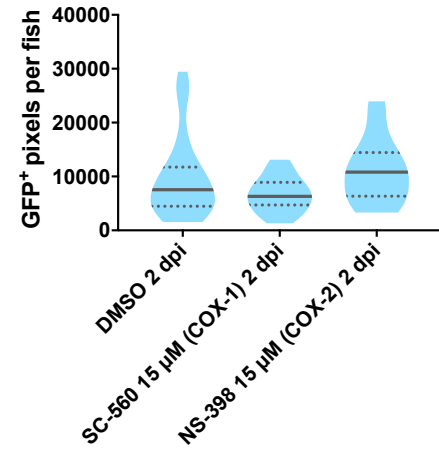**C i**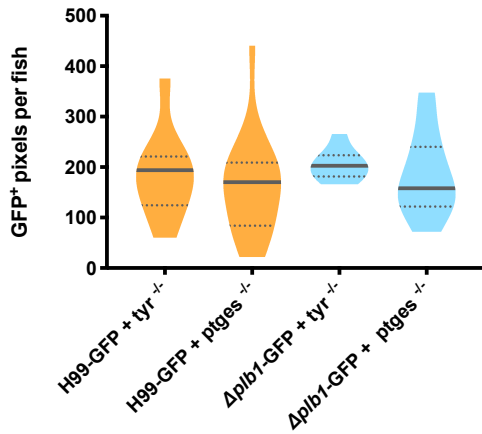**ii**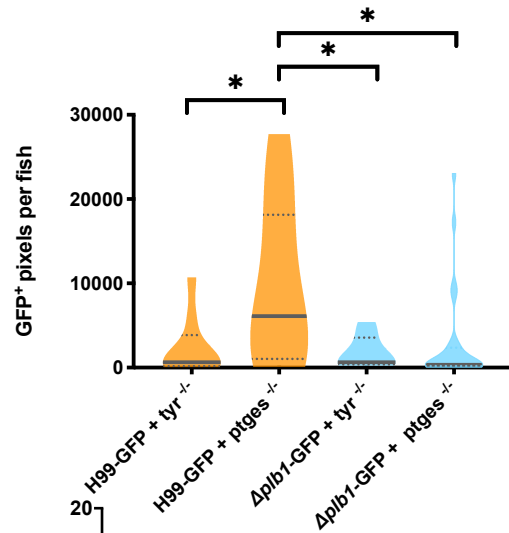**D i**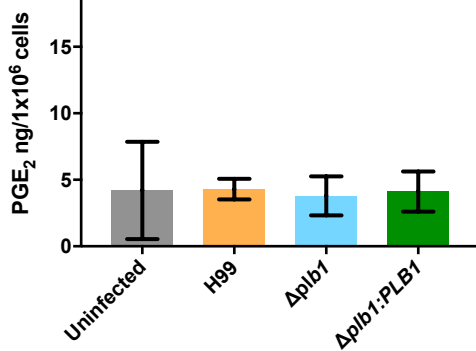**ii**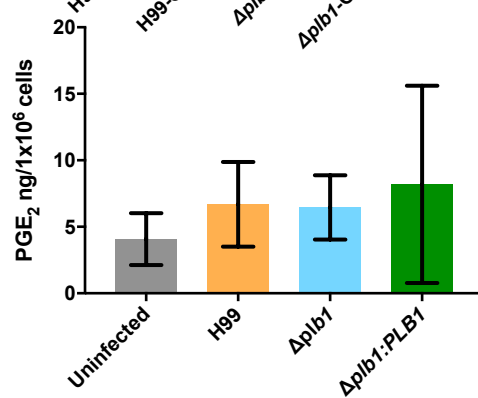**E i**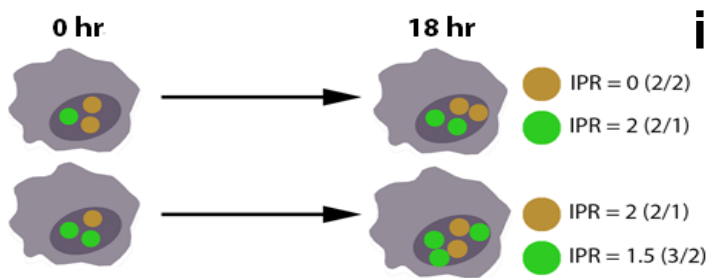**ii**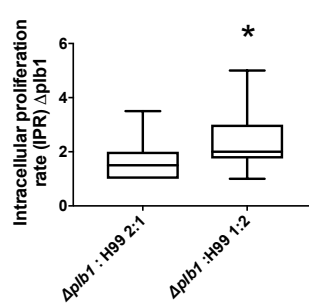

**Ai**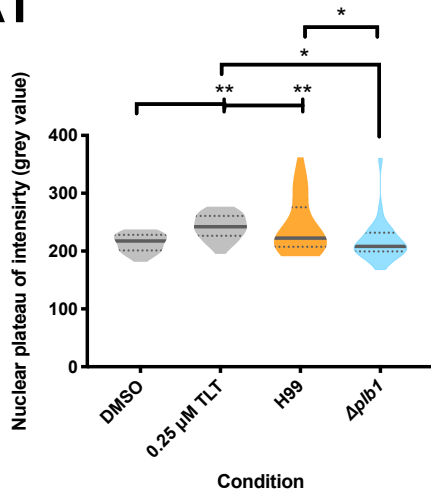**ii****DMSO****10  $\mu$ M 15-keto PGE<sub>2</sub>****0.25  $\mu$ M TLT****0.25  $\mu$ M TLT +  
10  $\mu$ M 15-keto PGE<sub>2</sub>**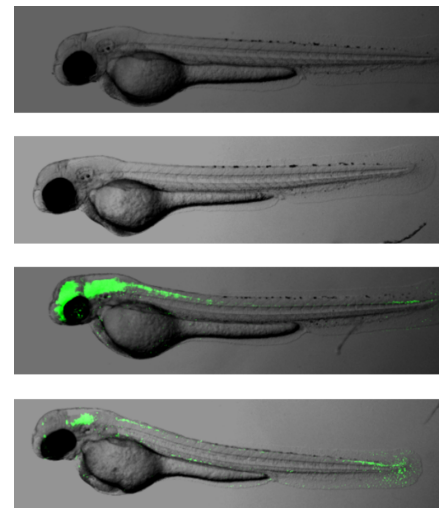**B**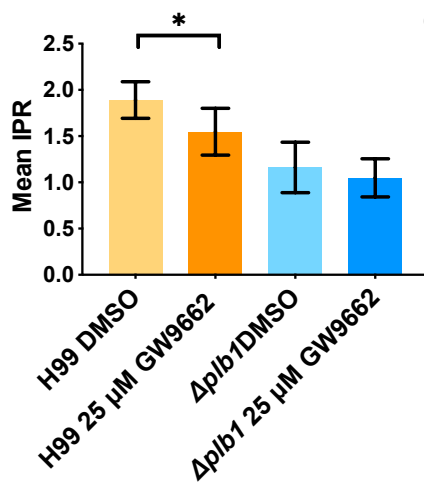**C**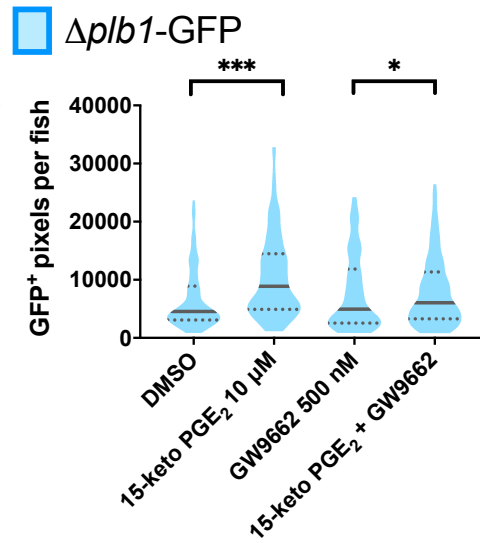

H99-GFP

 $\Delta$ plb1-GFP $\Delta$ lac1-GFP**Di**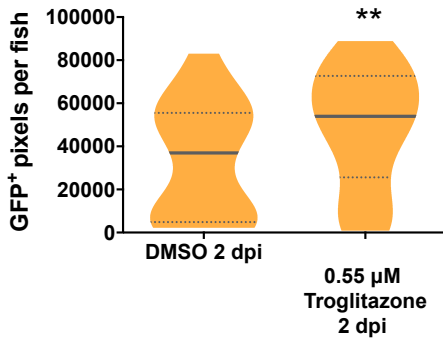**Ei**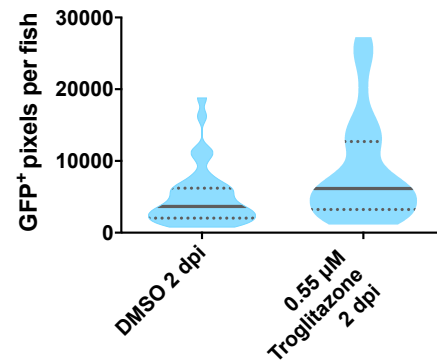**Fi**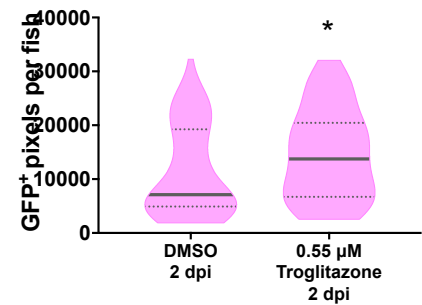**ii**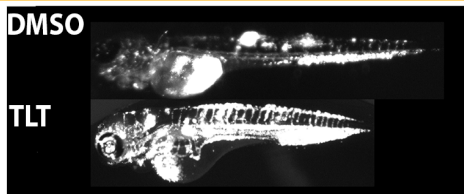**ii**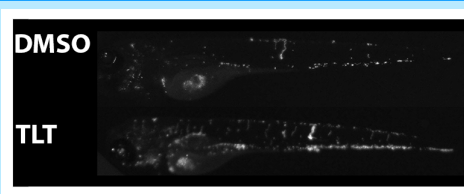**ii**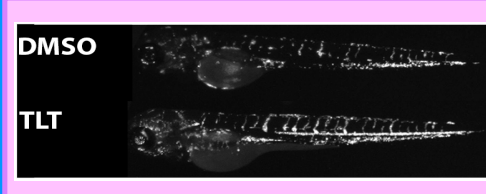

Source: https://www.biorxiv.org/content/biorxiv/early/2019/01/23/113167.full.pdf
